# Supplementary material for: Expression Profiling of FSHD-1 and FSHD-2 Cells during Myogenic Differentiation Evidences Common and Distinctive Gene Dysregulation Patterns
Source: PLoS One. 2011 Jun 13;6(6):e20966. doi: 10.1371/journal.pone.0020966 (PMC3113851; doi:10.1371/journal.pone.0020966)
Supplement: Table S1 — List of differentially expressed probes in FSHD-1 and FSHD-2 myoblasts (A and B), and in FSHD-1 and FSHD-2 myotubes (C and D). (XLS) [file pone.0020966.s001.xls]

## Sheet: S1
Table S1 : The lists of differentially expressed probes in A) FSHD-1 myoblasts, B) FSHD-2 myoblasts, C) FSHD-1 myotubes and D) FSHD-2 myotubes.
A) p-Value < 0,01 FC > 2
ENSEMBL ID	GENESYMBOL	CYTOBAND	FOLD-CHANGE	P-VALUE
ENSG00000054356	PTPRN	2q35-q36.1	3.14374	1.39601e-05
ENSG00000151692	RNF144A	2p25.2-p25.1	2.69469	4.44492e-05
ENSG00000148082	SHC3	9q22.1	2.70384	5.01559e-05
ENSG00000169116	AC110760.3	4q13.3-q21.3	3.47553	7.82068e-05
ENSG00000164929	BAALC	8q22.3	3.4137	0.000108402
ENSG00000179209	RP4-646B12.2	NA	3.12702	0.000155328
ENSG00000011465	DCN	12q21.33	2.95016	0.000214597
ENSG00000105711	SCN1B	19q13.1	2.32803	0.000232438
ENSG00000111962	UST	6q25.1	2.32335	0.000293338
ENSG00000064886	CHI3L2	1p13.3	2.32293	0.000321435
ENSG00000204103	MAFB	20q11.2-q13.1	2.78307	0.000323434
ENSG00000112096	SOD2	6q25.3	5.52931	0.000339796
ENSG00000060656	PTPRU	1p35.3-p35.1	2.77504	0.000359622
ENSG00000208492	AL138832.10	NA	2.35634	0.000377955
ENSG00000067992	PDK3	Xp22.11	2.52177	0.00039303
ENSG00000119655	NPC2	14q24.3	2.22218	0.000490681
ENSG00000186879	NA	NA	2.19869	0.000520907
ENSG00000158270	COLEC12	18pter-p11.3	6.65508	0.000600738
ENSG00000196549	MME	3q25.1-q25.2	8.5306	0.000623438
ENSG00000203500	AC008013.8	NA	3.26507	0.000628716
ENSG00000119915	ELOVL3	10q24.32	2.1009	0.000708323
ENSG00000170745	KCNS3	2p24	3.06244	0.000750191
ENSG00000198795	ZNF521	18q11.2	2.82755	0.000801153
ENSG00000019582	CD74	5q32	7.58147	0.000848772
ENSG00000167996	FTH1	11q13	2.51751	0.000871032
ENSG00000110002	VWA5A	11q23	2.25916	0.000888905
ENSG00000189283	FHIT	3p14.2	2.22274	0.000930907
ENSG00000067141	NEO1	15q22.3-q23	2.96083	0.00100922
ENSG00000173918	C1QTNF1	17q25.3	3.59743	0.00101598
ENSG00000145358	DDIT4L	4q23	4.31821	0.00102647
ENSG00000185650	ZFP36L1	14q22-q24	2.25887	0.00105876
ENSG00000167107	ACSF2	17q21.33	2.31953	0.00108377
ENSG00000122378	C10orf57	10q23.1	2.5983	0.00111102
ENSG00000171298	GAA	17q25.2-q25.3	2.36938	0.00114087
ENSG00000150594	ADRA2A	10q24-q26	2.76461	0.00114348
ENSG00000109472	CPE	4q32.3	3.42313	0.0012136
ENSG00000183762	KREMEN1	22q12.1	2.26859	0.00123088
ENSG00000180287	PLD5	1q43	4.45321	0.0012345
ENSG00000178184	PARD6G	18q23	2.35941	0.00123835
ENSG00000164050	PLXNB1	3p21.31	2.23007	0.00128194
ENSG00000180447	GAS1	9q21.3-q22	2.89152	0.00132725
ENSG00000123496	IL13RA2	Xq13.1-q28	14.9392	0.00140476
ENSG00000143786	CNIH3	1q42.12	2.98544	0.00141432
ENSG00000136235	GPNMB	7p15	3.63551	0.00146556
ENSG00000174899	C3orf55	NA	2.85056	0.00146851
ENSG00000184408	KCND2	7q31	6.26624	0.00167652
ENSG00000125730	C3	NA	11.4445	0.001695
ENSG00000153132	CLGN	4q28.3-q31.1	5.34834	0.00178238
ENSG00000078053	AMPH	7p14-p13	2.27515	0.00183325
ENSG00000003137	CYP26B1	2p13.3	3.34708	0.00184071
ENSG00000176971	FIBIN	11p14.2	5.31461	0.00195935
ENSG00000076716	GPC4	Xq26.1	5.11811	0.00196851
ENSG00000204257	HLA-DMA	6p21.3	3.48787	0.00207271
ENSG00000206803	U6	NA	3.00177	0.00208294
ENSG00000104870	FCGRT	19q13.3	2.04965	0.00217513
ENSG00000133424	LARGE	22q12.3	2.03731	0.00220962
ENSG00000154065	ANKRD29	18q11.2	6.46993	0.00221277
ENSG00000100505	TRIM9	14q22.1	2.21328	0.00232293
ENSG00000170271	C5orf4	5q31-q32	2.58324	0.00239888
ENSG00000162545	CAMK2N1	1p36.12	4.15117	0.00246591
ENSG00000085662	AKR1B1	7q35	2.26985	0.00254842
ENSG00000206816	Y_RNA	NA	2.14816	0.00256922
ENSG00000136040	PLXNC1	12q23.3	3.30967	0.00257956
ENSG00000109819	PPARGC1A	4p15.1	2.05293	0.00268247
ENSG00000108679	LGALS3BP	NA	2.4151	0.0027541
ENSG00000214814	FER1L6	NA	3.28493	0.00288826
ENSG00000159403	AC140077.17	NA	2.61697	0.00294258
ENSG00000147507	LYN	8q13	2.78352	0.00301059
ENSG00000135914	HTR2B	2q36.3-q37.1	2.47817	0.0032353
ENSG00000209702	SNORD41	NA	2.34893	0.00324771
ENSG00000197872	FAM49A	2p24.3	4.28072	0.0032888
ENSG00000188681	AC134878.3	NA	2.10775	0.00336209
ENSG00000164932	CTHRC1	8q22.3	2.71101	0.00378464
ENSG00000112796	ENPP5	6p21.1-p11.2	2.06446	0.00395391
ENSG00000170373	CST1	20p11.21	5.65674	0.00401842
ENSG00000123364	HOXC13	12q13.3	2.08375	0.00417906
ENSG00000141458	NPC1	18q11-q12	2.60443	0.00429643
ENSG00000165409	TSHR	14q31	2.53858	0.00446676
ENSG00000152661	GJA1	6q21-q23.2	2.39825	0.00455103
ENSG00000214617	SLC6A10P	NA	2.039	0.00476349
ENSG00000176597	B3GNT5	3q28	2.36866	0.00481545
ENSG00000164197	RNF180	5q12.2	2.77908	0.00486484
ENSG00000135929	CYP27A1	2q33-qter	2.4772	0.00505328
ENSG00000182326	C1S	12p13	2.12996	0.00548292
ENSG00000144724	PTPRG	3p21-p14	2.07684	0.00556119
ENSG00000127951	FGL2	7q11.23	3.16301	0.005565
ENSG00000158104	HPD	12q24-qter	3.14362	0.00560789
ENSG00000207275	U6	NA	2.78245	0.00568692
ENSG00000214660	AC006015.5	NA	2.067	0.00576419
ENSG00000125848	FLRT3	20p11	2.2378	0.00577393
ENSG00000144730	IL17RD	3p14.3	2.16123	0.00580997
ENSG00000181784	RNASE4	14q11.1	2.26019	0.00582555
ENSG00000135931	ARMC9	2q37.1	2.31327	0.00615007
ENSG00000077942	FBLN1	NA	2.56269	0.00615261
ENSG00000111058	ACSS3	12q21.31	2.20229	0.00616124
ENSG00000030304	MUSK	9q31.3-q32	7.51656	0.00621619
ENSG00000204634	TBC1D8	2q11.2	2.28576	0.00628923
ENSG00000125845	BMP2	20p12	2.65738	0.00630007
ENSG00000197635	DPP4	2q24.3	5.66326	0.0064449
ENSG00000162512	SDC3	1pter-p22.3	2.18275	0.00645044
ENSG00000204287	HLA-DRA	6p21.3	10.0438	0.00647987
ENSG00000201523	5S_rRNA	NA	2.05863	0.00648674
ENSG00000207563	hsa-mir-23b	NA	3.40261	0.00690207
ENSG00000092068	SLC7A8	14q11.2	6.46863	0.00690209
ENSG00000124814	NA	NA	2.99767	0.00695148
ENSG00000005073	HOXA11	7p15-p14	2.00038	0.00716423
ENSG00000199911	Y_RNA	NA	2.03509	0.0071746
ENSG00000104313	EYA1	8q13.3	2.33717	0.00723915
ENSG00000166741	NNMT	11q23.1	2.03259	0.00739727
ENSG00000132386	SERPINF1	17p13.1	3.81664	0.0074107
ENSG00000155897	ADCY8	NA	3.2689	0.00770119
ENSG00000128849	CGNL1	15q21.3	2.18199	0.00796018
ENSG00000053747	LAMA3	18q11.2	5.23728	0.00812279
ENSG00000041353	RAB27B	18q21.2	2.72443	0.00835667
ENSG00000185499	MUC1	1q21	2.24391	0.00848955
ENSG00000118257	NRP2	2q33.3	4.29975	0.00856451
ENSG00000134824	FADS2	11q12-q13.1	2.03509	0.00856674
ENSG00000186261	AC027277.5	NA	2.12057	0.0088144
ENSG00000182240	BACE2	21q22.3	3.34326	0.0088625
ENSG00000162645	GBP2	1p22.2	3.39012	0.00925018
ENSG00000196126	HLA-DRB1	6p21.3	6.35189	0.00929742
ENSG00000133135	RNF128	Xq22.3	2.12219	0.00953464
ENSG00000132429	POPDC3	6q21	2.13471	0.00959377
ENSG00000117707	PROX1	1q32.2-q32.3	2.39973	0.00960389
ENSG00000109062	SLC9A3R1	17q25.1	2.26695	0.00977723
ENSG00000183570	PCBP3	21q22.3	2.34367	0.00985545
ENSG00000129152	MYOD1	11p15.4	2.39	0.010138
ENSG00000135903	PAX3	2q35	2.17	0.01
ENSG00000196226	HIST1H2BB	6p21.3	-5.82158	1.89438e-05
ENSG00000182963	GJC1	17q21.31	-2.02434	5.60302e-05
ENSG00000140105	WARS	14q32.31	-2.07135	0.00015646
ENSG00000149177	PTPRJ	11p11.2	-2.274	0.000183601
ENSG00000139514	SLC7A1	13q12-q14	-2.57795	0.000184705
ENSG00000176208	ATAD5	17q11.2	-3.69907	0.000201789
ENSG00000137807	KIF23	15q23	-3.88786	0.00020918
ENSG00000080839	RBL1	20q11.2	-2.57591	0.000214282
ENSG00000146263	C6orf167	6q16.1	-3.16098	0.000236761
ENSG00000139618	BRCA2	13q12.3	-3.21607	0.000253705
ENSG00000104889	RNASEH2A	19p13.13	-2.29403	0.000280256
ENSG00000168497	SDR	2q32-q33	-2.83919	0.000312818
ENSG00000123374	CDK2	12q13	-2.86983	0.000331167
ENSG00000212371	SNORA46	NA	-2.74073	0.000360617
ENSG00000154839	C18orf24	18q21.1	-3.71655	0.000393806
ENSG00000115902	SLC1A4	2p15-p13	-2.40825	0.000536482
ENSG00000210509	AC040975.8	NA	-2.52496	0.000550182
ENSG00000166845	C18orf54	18q21.2	-2.69096	0.000556584
ENSG00000123473	STIL	1p32; 1q32	-3.01746	0.000584582
ENSG00000197299	BLM	15q26.1	-2.7924	0.00058686
ENSG00000121621	KIF18A	11p14.1	-4.44263	0.000593912
ENSG00000184825	HIST1H2AH	6p21.33	-3.64374	0.00059815
ENSG00000094804	CDC6	17q21.3	-4.26012	0.000607204
ENSG00000138346	DNA2L	10q21.3-q22.1	-2.40727	0.000610832
ENSG00000186871	ERCC6L	Xq13.1	-3.08212	0.000651994
ENSG00000138160	KIF11	10q24.1	-4.80443	0.00065913
ENSG00000146670	CDCA5	11q12.1	-3.21142	0.000691057
ENSG00000201599	SNORA71	NA	-3.61266	0.000702167
ENSG00000130816	DNMT1	19p13.2	-2.02031	0.00070367
ENSG00000199796	U6	NA	-2.34659	0.000730567
ENSG00000065328	MCM10	10p13	-3.84864	0.000736172
ENSG00000137259	HIST1H2AB	NA	-3.97911	0.00074485
ENSG00000184445	KNTC1	12q24.31	-3.15013	0.000788925
ENSG00000137310	TCF19	6p21.3	-2.85468	0.000792412
ENSG00000208985	AC114772.5	NA	-2.01882	0.00079973
ENSG00000138092	CENPO	2p23.3	-2.43456	0.000816642
ENSG00000102384	CENPI	Xq22.1	-3.90567	0.000828939
ENSG00000214264	AP002884.5	NA	-2.06977	0.000871565
ENSG00000207424	SNORD30	NA	-3.73353	0.000917157
ENSG00000111247	RAD51AP1	12p13.2-p13.1	-3.24622	0.000983643
ENSG00000171320	ESCO2	8p21.1	-5.58033	0.000991342
ENSG00000196526	AFAP	4p16	-2.38056	0.000994131
ENSG00000197061	HIST1H4C	NA	-2.50773	0.00100324
ENSG00000156802	ATAD2	8q24.13	-4.25208	0.00102902
ENSG00000177425	PAWR	12q21	-3.00078	0.00103996
ENSG00000100297	MCM5	22q13.1	-2.80246	0.00107889
ENSG00000093009	CDC45L	22q11.21	-2.80078	0.00108701
ENSG00000101945	SUV39H1	Xp11.23	-2.37619	0.00112039
ENSG00000181544	FANCB	Xp22.2	-2.95278	0.00114068
ENSG00000166881	TMEM194A	12q13.3	-2.2449	0.00119067
ENSG00000145555	MYO10	5p15.1-p14.3	-2.5413	0.00119712
ENSG00000014138	POLA2	11q13.1	-2.47056	0.00122265
ENSG00000187790	FANCM	14q21.3	-2.34094	0.0012506
ENSG00000137812	CASC5	15q14	-4.24553	0.00130311
ENSG00000104738	MCM4	8q11.2	-2.50193	0.0013063
ENSG00000134363	FST	5q11.2	-5.39644	0.0013431
ENSG00000165480	C13orf3	13q12.11	-3.90269	0.00134946
ENSG00000071539	TRIP13	5p15.33	-4.28413	0.00136439
ENSG00000012048	BRCA1	17q21	-2.64231	0.00137814
ENSG00000111445	RFC5	12q24.23	-2.0305	0.00141024
ENSG00000174442	ZWILCH	15q22.31	-2.91451	0.00143772
ENSG00000095002	MSH2	2p22-p21	-2.31131	0.00143954
ENSG00000154127	UBASH3B	11q24.1	-2.90872	0.00144879
ENSG00000111602	TIMELESS	12q12-q13	-2.2003	0.0014577
ENSG00000101868	POLA1	Xp22.1-p21.3	-2.16912	0.00147034
ENSG00000156970	BUB1B	15q15	-4.50714	0.00147165
ENSG00000115355	CCDC88A	2p16.1	-2.23156	0.00151127
ENSG00000143153	ATP1B1	1q24	-2.09688	0.00152174
ENSG00000000460	C1orf112	1q24.2	-2.52371	0.00152688
ENSG00000120526	NUDCD1	8q23	-2.29866	0.00153326
ENSG00000125885	MCM8	20p12.3	-3.09591	0.00153843
ENSG00000161888	SPC24	19p13.2	-2.22768	0.00157155
ENSG00000119969	HELLS	10q24.2	-3.97407	0.00162792
ENSG00000145375	SPATA5	4q28.1	-2.16234	0.00163102
ENSG00000076382	SPAG5	17q11.2	-3.29169	0.00166086
ENSG00000133119	RFC3	13q12.3-q13	-3.29848	0.0017537
ENSG00000161800	RACGAP1	12q13.13	-2.77911	0.00175421
ENSG00000070669	ASNS	7q21.3	-2.49691	0.00179552
ENSG00000120699	EXOSC8	13q13.1	-2.27004	0.00180532
ENSG00000169607	CKAP2L	2q13	-3.5891	0.0018436
ENSG00000145386	CCNA2	4q25-q31	-3.35862	0.00187259
ENSG00000073111	MCM2	3q21	-2.21703	0.00187306
ENSG00000164104	HMGB2	4q31	-2.11463	0.00190835
ENSG00000146918	NCAPG2	7q36.3	-3.12567	0.00193102
ENSG00000198554	WDHD1	14q22.3	-2.37538	0.00194069
ENSG00000147536	GINS4	8p11.21	-3.52788	0.00196047
ENSG00000179750	APOBEC3B	22q13.1-q13.2	-3.29364	0.00196127
ENSG00000163918	RFC4	3q27	-2.40402	0.00198011
ENSG00000136261	BZW2	7p21.1	-2.17666	0.00201213
ENSG00000156136	DCK	4q13.3-q21.1	-2.07911	0.00205243
ENSG00000188014	AC023886.7	4q25	-2.06126	0.00210109
ENSG00000165490	C11orf82	11q14.1	-3.54316	0.00218956
ENSG00000115380	EFEMP1	2p16	-3.44699	0.00219954
ENSG00000138623	SEMA7A	15q22.3-q23	-2.01448	0.00220641
ENSG00000109805	HCAP-G	4p15.33	-5.19401	0.00221892
ENSG00000149636	C20orf172	20q11.23	-2.0947	0.00223084
ENSG00000167325	RRM1	11p15.5	-2.06156	0.00226562
ENSG00000112118	MCM3	6p12	-2.37334	0.00232413
ENSG00000087586	AURKA	20q13.2-q13.3	-3.13612	0.0023253
ENSG00000165304	MELK	9p13.2	-3.21104	0.00233273
ENSG00000184348	HIST1H2AK	NA	-2.39151	0.00236045
ENSG00000118655	DCLRE1B	1p13.2	-2.05346	0.00237255
ENSG00000091651	ORC6L	16q12	-2.30361	0.00240674
ENSG00000198826	ARHGAP11A	NA	-3.93572	0.00241917
ENSG00000147862	NFIB	9p24.1	-2.54017	0.0024289
ENSG00000174371	EXO1	1q42-q43	-3.94912	0.00250125
ENSG00000034063	UHRF1	NA	-2.34178	0.00251212
ENSG00000100479	POLE2	14q21-q22	-2.97258	0.00255184
ENSG00000154920	EME1	17q21.33	-2.03647	0.00256835
ENSG00000104356	POP1	8q22.1	-2.54926	0.00259511
ENSG00000148773	MKI67	10q25-qter	-3.66744	0.00261914
ENSG00000183023	SLC8A1	2p23-p22	-2.55833	0.00265526
ENSG00000092853	CLSPN	1p34.2	-3.52793	0.00265746
ENSG00000075213	SEMA3A	7p12.1	-3.75002	0.00269208
ENSG00000011426	ANLN	7p15-p14	-4.67749	0.00273416
ENSG00000143476	DTL	1q32.1-q32.2	-5.17457	0.00283885
ENSG00000112742	TTK	6q13-q21	-4.5705	0.00285145
ENSG00000115159	GPD2	2q24.1	-2.05989	0.00287011
ENSG00000051825	MPHOSPH9	12q24.31	-2.05588	0.00294145
ENSG00000170312	CDC2	10q21.1	-3.61739	0.00296166
ENSG00000155561	NUP205	7q33	-2.1424	0.00297554
ENSG00000138658	C4orf21	4q25	-2.08956	0.00302559
ENSG00000206735	NA	NA	-3.54249	0.00307857
ENSG00000138180	CEP55	10q23.33	-3.76074	0.00310373
ENSG00000144554	FANCD2	3p26	-2.85844	0.00325394
ENSG00000196584	XRCC2	7q36.1	-2.59746	0.00330965
ENSG00000118193	KIF14	1q32.1	-4.40864	0.00331852
ENSG00000139734	DIAPH3	NA	-3.92234	0.0033385
ENSG00000106366	SERPINE1	7q21.3-q22	-2.28763	0.00334276
ENSG00000142731	PLK4	4q28	-3.40629	0.00334973
ENSG00000072501	SMC1A	Xp11.22-p11.21	-2.068	0.00335543
ENSG00000165891	E2F7	12q21.2	-2.28165	0.0033798
ENSG00000118513	MYB	6q22-q23	-2.53676	0.00350537
ENSG00000181201	AL139288.15	NA	-2.19165	0.00350889
ENSG00000168496	FEN1	11q12	-2.28123	0.00351614
ENSG00000065911	MTHFD2	2p13.1	-2.93059	0.00353167
ENSG00000184661	CDCA2	8p21.2	-4.45696	0.0035825
ENSG00000123485	HJURP	2q37.1	-2.3148	0.00361034
ENSG00000151849	CENPJ	13q12.12	-2.17028	0.00362289
ENSG00000203813	HIST1H3H	NA	-2.49256	0.00369749
ENSG00000135069	PSAT1	9q21.2	-3.24844	0.0036988
ENSG00000085840	ORC1L	1p32	-2.52222	0.00380679
ENSG00000198366	HIST1H3A	NA	-2.28079	0.00384048
ENSG00000198056	PRIM1	12q13	-2.05856	0.00384892
ENSG00000198558	HIST1H4L	NA	-2.23155	0.00384987
ENSG00000131737	KRT34	17q12-q21	-2.99035	0.00386901
ENSG00000112029	FBXO5	6q25.2	-2.49544	0.00396119
ENSG00000104626	THEX1	8p23.1	-2.57752	0.00399585
ENSG00000140525	FANCI	15q26.1	-3.09522	0.00400068
ENSG00000112175	BMP5	6p12.1	-2.18476	0.00400367
ENSG00000051180	RAD51	15q15.1	-2.34196	0.00400547
ENSG00000158169	FANCC	9q22.3	-2.12477	0.00408793
ENSG00000075218	GTSE1	22q13.2-q13.3	-2.41916	0.00411655
ENSG00000134690	CDCA8	1p34.3	-2.63228	0.00417281
ENSG00000051341	POLQ	3q13.33	-2.72316	0.00423287
ENSG00000120802	TMPO	12q22	-2.90425	0.0043141
ENSG00000172167	MTBP	8q24.12	-2.90715	0.004315
ENSG00000138182	KIF20B	10q23.31	-3.77959	0.00431989
ENSG00000164045	CDC25A	3p21	-2.29474	0.00433265
ENSG00000066279	ASPM	1q31	-3.769	0.00434164
ENSG00000121152	NCAPH	2q11.2	-3.15483	0.00446044
ENSG00000119139	TJP2	9q13-q21	-2.20134	0.00450446
ENSG00000090889	KIF4A	NA	-3.42434	0.00451932
ENSG00000171241	SHCBP1	16q11.2	-4.40377	0.00465402
ENSG00000163507	KIAA1524	3q13.13	-3.1289	0.00465616
ENSG00000013810	TACC3	4p16.3	-2.44146	0.00466369
ENSG00000163535	SGOL2	2q33.1	-2.91787	0.00470481
ENSG00000100749	VRK1	14q32	-2.24737	0.00471349
ENSG00000171488	LRRC8C	1p22.2	-3.04759	0.00473753
ENSG00000142945	KIF2C	1p34.1	-3.331	0.00477951
ENSG00000187741	FANCA	16q24.3	-2.06663	0.00487292
ENSG00000129810	SGOL1	3p24.3	-3.30378	0.00490832
ENSG00000136928	GABBR2	9q22.1-q22.3	-2.71402	0.00499072
ENSG00000113569	NUP155	5p13.1	-2.18071	0.0052728
ENSG00000163110	PDLIM5	4q22	-2.17887	0.00540147
ENSG00000166851	PLK1	16p12.1	-4.11997	0.00548343
ENSG00000076003	MCM6	2q21	-2.08045	0.00554924
ENSG00000201980	SNORA62	NA	-2.0022	0.00558286
ENSG00000138778	CENPE	4q24-q25	-3.55342	0.00561449
ENSG00000131747	TOP2A	NA	-4.25059	0.00570385
ENSG00000135048	TMEM2	9q13-q21	-2.4982	0.00577802
ENSG00000135269	TES	7q31.2	-3.0291	0.00586042
ENSG00000117724	CENPF	1q32-q41	-3.1589	0.00587289
ENSG00000100234	TIMP3	22q12.1-q13.2; 22q12.3	-2.72319	0.00588593
ENSG00000205130	NA	NA	-2.04414	0.00592306
ENSG00000172244	C5orf34	5p12	-2.18465	0.00597964
ENSG00000183856	IQGAP3	1q22-q23.1	-2.14691	0.00608863
ENSG00000158402	CDC25C	5q31	-2.83089	0.0061449
ENSG00000113368	LMNB1	5q23.3-q31.1	-2.93206	0.00615578
ENSG00000171848	RRM2	2p25-p24	-3.52407	0.00622978
ENSG00000208457	AC110926.5	NA	-2.00784	0.00629445
ENSG00000101003	GINS1	20p11.21	-3.28034	0.00631135
ENSG00000166508	MCM7	7q21.3-q22.1	-2.22029	0.00644492
ENSG00000180611	C3orf59	3q29	-2.40651	0.00648309
ENSG00000114346	ECT2	3q26.1-q26.2	-2.53328	0.0065142
ENSG00000179958	DCTPP1	16p11.2	-2.08511	0.00654688
ENSG00000137831	UACA	15q22-q24	-2.0072	0.00654877
ENSG00000169679	BUB1	2q14	-3.68399	0.00659477
ENSG00000185480	C12orf48	12q23.2	-2.2297	0.00666822
ENSG00000196581	AJAP1	1p36.32	-4.53804	0.00670093
ENSG00000197046	SIGLEC15	18q12.3	-2.49514	0.006719
ENSG00000112312	GMNN	6p22.2	-2.27551	0.00672679
ENSG00000113810	SMC4	3q26.1	-2.8719	0.00675688
ENSG00000077152	UBE2T	1q32.1	-2.29789	0.00681442
ENSG00000118777	ABCG2	4q22	-2.84479	0.0068311
ENSG00000162063	CCNF	16p13.3	-2.19665	0.00697744
ENSG00000168078	PBK	8p21.2	-4.64498	0.00699075
ENSG00000143493	INTS7	1p36.13-q42.3	-2.10663	0.00699098
ENSG00000120992	LYPLA1	8q11.23	-2.35131	0.00699967
ENSG00000131153	GINS2	16q24.1	-2.38276	0.00707529
ENSG00000178999	AURKB	17p13.1	-2.13145	0.00708183
ENSG00000117399	CDC20	1p34.1	-3.74482	0.00718011
ENSG00000138675	FGF5	4q21	-2.74226	0.00729636
ENSG00000143228	NUF2	1q23.3	-4.04427	0.0073593
ENSG00000131470	PSMC3IP	17q12-q21	-2.36682	0.00747234
ENSG00000203760	C6orf173	6q22.32	-2.29195	0.00764063
ENSG00000072571	HMMR	5q33.2-qter	-3.92559	0.00764104
ENSG00000151725	MLF1IP	4q35.1	-2.72917	0.00765612
ENSG00000204197	KIFC1	6p21.3	-2.1499	0.00778317
ENSG00000156876	SASS6	1p21.2	-2.06172	0.00781287
ENSG00000126787	DLGAP5	14q22.3	-3.84263	0.00783857
ENSG00000206874	SNORD26	NA	-2.47207	0.00790497
ENSG00000088325	TPX2	20q11.2	-3.58489	0.00793613
ENSG00000135905	DOCK10	2q36.2	-2.69503	0.0080975
ENSG00000212456	U1	NA	-2.19348	0.00820209
ENSG00000198901	PRC1	15q26.1	-3.28893	0.00852138
ENSG00000157168	NRG1	8p12	-2.83574	0.00852237
ENSG00000184226	PCDH9	13q14.3-q21.1	-2.23085	0.00856197
ENSG00000211384	AC012154.16	NA	-2.10013	0.008601
ENSG00000097046	CDC7	1p22	-2.11751	0.00861602
ENSG00000040275	CCDC99	5q35.1	-2.28882	0.00865596
ENSG00000178458	HIST1H3G	NA	-4.87478	0.00870093
ENSG00000208822	AL158824.11	NA	-2.02792	0.00885022
ENSG00000115232	ITGA4	2q31.3	-2.68419	0.00904163
ENSG00000111206	FOXM1	12p13	-2.65888	0.00908506
ENSG00000068489	PRR11	17q22	-2.6689	0.00910294
ENSG00000024526	DEPDC1	1p31.2	-3.99912	0.00913086
ENSG00000080986	KNTC2	18p11.32	-3.12226	0.00934683
ENSG00000200142	Y_RNA	NA	-2.12256	0.00956675
B) p-Value < 0,001 FC > 2
ENSEMBL ID	GENESYMBOL	CYTOBAND	FOLD-CHANGE	P-VALUE
ENSG00000114315	HES1	3q28-q29	5.29132	7.65118e-07
ENSG00000213538	AF224669.1	NA	2.64866	9.85841e-06
ENSG00000114529	C3orf52	3q13.2	2.91352	1.49809e-05
ENSG00000107282	APBA1	9q13-q21.1	2.30236	2.65798e-05
ENSG00000179097	HTR1F	3p12	2.53168	3.47446e-05
ENSG00000179094	PER1	17p13.1-p12	2.41393	5.16134e-05
ENSG00000071859	FAM50A	Xq28	2.20141	5.30745e-05
ENSG00000200485	Y_RNA	NA	3.0387	6.13936e-05
ENSG00000144834	TAGLN3	3q13.2	2.23589	6.88117e-05
ENSG00000201691	Y_RNA	NA	3.06964	7.41019e-05
ENSG00000154102	C16orf74	16q24.1	2.43859	8.38642e-05
ENSG00000180287	PLD5	1q43	9.17248	0.00010445
ENSG00000185262	FAM100B	17q25.1	2.11208	0.00013233
ENSG00000201367	U6	NA	8.8851	0.000133635
ENSG00000207786	hsa-mir-133a-1	NA	3.12684	0.000142694
ENSG00000100823	APEX1	14q11.2-q12	2.25772	0.000165442
ENSG00000183684	THOC4	17q25.3	2.86528	0.000171066
ENSG00000134516	DOCK2	5q35.1	2.33027	0.000185701
ENSG00000121904	CSMD2	1p35.1-p34.3	2.35798	0.000203699
ENSG00000151812	SLC35F4	14q22.2	2.56377	0.000214224
ENSG00000202017	U6	NA	2.77243	0.00022017
ENSG00000054654	SYNE2	14q23.2	3.11042	0.000239206
ENSG00000076356	PLXNA2	1q32.2	4.77359	0.000254489
ENSG00000211740	U66060.1	NA	3.47102	0.000292718
ENSG00000134824	FADS2	11q12-q13.1	3.43657	0.000320378
ENSG00000100941	PNN	14q21.1	3.60992	0.000335133
ENSG00000151136	BTBD11	12q23.3	3.021	0.000366156
ENSG00000167723	TRPV3	17p13.3	2.16482	0.000409864
ENSG00000125351	UPF3B	Xq25-q26	2.03074	0.00044283
ENSG00000100302	RASD2	22q13.1	4.71815	0.000466764
ENSG00000166396	SERPINB7	18q21.33	4.06658	0.000484002
ENSG00000200838	U1	NA	2.60743	0.000516494
ENSG00000101665	SMAD7	18q21.1	2.16655	0.000589574
ENSG00000102385	DRP2	Xq22	2.16309	0.000604112
ENSG00000081059	TCF7	5q31.1	2.05012	0.00061734
ENSG00000167670	CHAF1A	19p13.3	2.0845	0.000658641
ENSG00000125848	FLRT3	20p11	3.34017	0.000667838
ENSG00000125247	TMTC4	13q32.3	2.10315	0.000671844
ENSG00000208185	AC103590.2	NA	3.35514	0.000675566
ENSG00000147231	CXorf57	Xq22.3	2.17479	0.000715609
ENSG00000202318	Y_RNA	NA	2.66233	0.000717619
ENSG00000128567	PODXL	7q32-q33	8.14793	0.000718401
ENSG00000168528	SERINC2	1p35.1	2.6908	0.000735407
ENSG00000064655	EYA2	20q13.1	2.4211	0.000744548
ENSG00000209039	AC004832.3	NA	3.13357	0.000763113
ENSG00000149289	ZC3H12C	11q22.3	2.3037	0.000779789
ENSG00000120217	CD274	9p24	4.37382	0.000948372
ENSG00000162551	ALPL	1p36.12	-3.09406	3.32679e-05
ENSG00000209702	SNORD41	NA	-4.51707	6.84535e-05
ENSG00000199631	SNORD33	NA	-2.71987	8.462e-05
ENSG00000011465	DCN	12q21.33	-3.67151	0.000108966
ENSG00000115380	EFEMP1	2p16	-7.04771	0.000119945
ENSG00000115109	EPB41L5	2q14.2	-2.7512	0.000121022
ENSG00000210038	AC010310.5	NA	-2.51393	0.000143413
ENSG00000142156	COL6A1	21q22.3	-2.14342	0.000184248
ENSG00000138061	CYP1B1	2p21	-8.49799	0.00021095
ENSG00000092607	TBX15	1p11.1	-2.02693	0.000280254
ENSG00000112769	LAMA4	6q21	-10.2125	0.000289877
ENSG00000168967	PMCHL1	NA	-2.52572	0.000314517
ENSG00000122884	P4HA1	10q21.3-q23.1	-2.56663	0.000386057
ENSG00000200867	7SK	NA	-2.14651	0.000386885
ENSG00000214139	NA	NA	-3.16207	0.000439448
ENSG00000106546	AHR	7p15	-2.90988	0.000450739
ENSG00000120885	CLU	8p21-p12	-3.23719	0.000554771
ENSG00000168542	COL3A1	2q31	-3.87143	0.000692074
ENSG00000172164	SNTB1	8q23-q24	-3.77269	0.000743015
ENSG00000212667	NA	NA	-8.60003	0.000922409
ENSG00000113083	LOX	5q23.2	-2.49165	0.000972717
ENSG00000186019	ZNF224	19q13.2	-2.03965	0.000982154
ENSG00000134013	LOXL2	8p21.3-p21.2	-3.6679	0.00101803
C) p-Value < 0,01 FC > 2
ENSEMBL ID	GENESYMBOL	CYTOBAND	FOLD-CHANGE	P-VALUE
ENSG00000120952	PRAMEF2	1p36.21	2.66754	4.99683e-07
ENSG00000174325	DIRC1	2q33	3.07468	0.000136239
ENSG00000187574	AC008749.6	19q13.42	3.63482	0.000140868
ENSG00000041353	RAB27B	18q21.2	5.1989	0.000184767
ENSG00000203781	AL591704.7	NA	2.52403	0.000233447
ENSG00000064886	CHI3L2	1p13.3	2.3789	0.000250571
ENSG00000085662	AKR1B1	7q35	2.93164	0.000283022
ENSG00000017483	SLC38A5	Xp11.23	3.98276	0.000377212
ENSG00000164929	BAALC	8q22.3	2.87443	0.000428429
ENSG00000123496	IL13RA2	Xq13.1-q28	20.9398	0.000540806
ENSG00000103569	AQP9	15q22.1-q22.2	2.69111	0.000694135
ENSG00000157551	KCNJ15	21q22.2	2.67107	0.00079147
ENSG00000147145	LPAR4	Xq13-q21.1	2.36615	0.000848196
ENSG00000166825	ANPEP	15q25-q26	2.24488	0.00092242
ENSG00000158270	COLEC12	18pter-p11.3	6.01441	0.000943924
ENSG00000206111	NA	NA	2.01747	0.0011994
ENSG00000201052	NA	NA	2.01061	0.00137732
ENSG00000170961	HAS2	8q24.12	3.88749	0.00147829
ENSG00000125848	FLRT3	20p11	2.5813	0.0018518
ENSG00000167992	VWCE	11q12.2	3.27404	0.0021661
ENSG00000013293	SLC7A14	3q26.2	4.7307	0.00240273
ENSG00000206999	U6	NA	3.19896	0.00241499
ENSG00000120549	KIAA1217	10p12.2-p12.1	2.04072	0.00243612
ENSG00000208446	AC007687.17	NA	2.36864	0.00247868
ENSG00000189367	C6orf174	6q22.33	3.16931	0.00253621
ENSG00000112796	ENPP5	6p21.1-p11.2	2.16134	0.0025723
ENSG00000067992	PDK3	Xp22.11	2.06993	0.00265446
ENSG00000182053	AC084851.2	11p11.12	2.18513	0.00271415
ENSG00000145358	DDIT4L	4q23	3.61631	0.00273233
ENSG00000210604	AC078889.20	NA	2.06294	0.00288625
ENSG00000169116	AC110760.3	4q13.3-q21.3	2.25031	0.00293804
ENSG00000207089	U6	NA	2.74159	0.00296206
ENSG00000131459	GFPT2	5q34-q35	2.64189	0.00300097
ENSG00000211728	U66060.1	NA	2.6851	0.00315131
ENSG00000214886	FAM177A2	4q23	2.07792	0.00346875
ENSG00000139364	TMEM132B	12q24.31-q24.32	2.7172	0.00347885
ENSG00000180447	GAS1	9q21.3-q22	2.52397	0.00362666
ENSG00000200566	U5	NA	2.40812	0.00369152
ENSG00000179656	NA	NA	3.77833	0.00397923
ENSG00000133805	AMPD3	11p15	3.57306	0.00440622
ENSG00000202223	NA	NA	3.25845	0.00456273
ENSG00000117594	HSD11B1	1q32-q41	2.58413	0.00463478
ENSG00000110092	CCND1	11q13	2.18344	0.00480951
ENSG00000102359	SRPX2	Xq21.33-q23	2.34143	0.00493575
ENSG00000203299	NA	NA	2.25011	0.00510105
ENSG00000108691	CCL2	17q11.2-q12	2.84004	0.00518339
ENSG00000078053	AMPH	7p14-p13	2.02367	0.00538306
ENSG00000179751	SYCN	19q13.2	3.0427	0.005406
ENSG00000110031	LPXN	11q12.1	5.35936	0.00541667
ENSG00000174125	TLR1	4p14	2.00738	0.00545681
ENSG00000201395	7SK	NA	2.23296	0.005844
ENSG00000135929	CYP27A1	2q33-qter	2.41952	0.00599362
ENSG00000170745	KCNS3	2p24	2.31807	0.00608107
ENSG00000196549	MME	3q25.1-q25.2	4.79759	0.00624863
ENSG00000147507	LYN	8q13	2.48457	0.00660749
ENSG00000125675	GRIA3	Xq25-q26	4.05402	0.00686129
ENSG00000211026	AP003530.3	NA	2.22546	0.0070521
ENSG00000173918	C1QTNF1	17q25.3	2.62505	0.00751874
ENSG00000162493	PDPN	1p36.21	5.28688	0.00762632
ENSG00000210196	AF347015.1	NA	2.2864	0.00765601
ENSG00000197646	PDCD1LG2	9p24.2	2.71029	0.00782137
ENSG00000109062	SLC9A3R1	17q25.1	2.33316	0.00794515
ENSG00000154928	EPHB1	3q21-q23	2.11144	0.00826675
ENSG00000184408	KCND2	7q31	4.27268	0.00827929
ENSG00000199845	5S_rRNA	NA	2.70159	0.00850638
ENSG00000211119	AC005879.3	NA	2.3335	0.00859171
ENSG00000128849	CGNL1	15q21.3	2.15994	0.00861878
ENSG00000170921	TANC2	17q23.3	2.03852	0.00899298
ENSG00000173660	UQCRH	NA	2.3951	0.00908661
ENSG00000168398	BDKRB2	14q32.1-q32.2	2.95187	0.00934477
ENSG00000162144	CYBASC3	11q12.2	2.1901	0.00942693
ENSG00000162687	KCNT2	1q31.3	-2.79585	4.10485e-05
ENSG00000115902	SLC1A4	2p15-p13	-3.12718	4.80808e-05
ENSG00000147421	HMBOX1	8p21.1	-2.22655	0.000126385
ENSG00000115380	EFEMP1	2p16	-4.947	0.000271301
ENSG00000099204	ABLIM1	10q25	-2.23926	0.000314309
ENSG00000057294	PKP2	12p11	-3.18876	0.000530933
ENSG00000202255	Y_RNA	NA	-2.13161	0.000596471
ENSG00000121039	RDH10	8q21.11	-3.75117	0.000601495
ENSG00000070669	ASNS	7q21.3	-2.78597	0.00073568
ENSG00000147862	NFIB	9p24.1	-2.87427	0.000935623
ENSG00000146733	PSPH	7p15.2-p15.1	-2.20546	0.000941468
ENSG00000111907	TPD52L1	6q22-q23	-4.113	0.00103975
ENSG00000198523	PLN	6q22.1	-2.36345	0.00119979
ENSG00000154556	SORBS2	4q35.1	-2.88764	0.00142694
ENSG00000111912	ESNA1	6q22.31-q22.32	-2.85226	0.00144563
ENSG00000121989	ACVR2A	2q22.3	-2.88883	0.00175482
ENSG00000115896	PLCL1	2q33	-2.11706	0.00177332
ENSG00000164761	TNFRSF11B	8q24	-4.78401	0.00178879
ENSG00000207721	hsa-mir-186	NA	-2.30411	0.00208687
ENSG00000214594	PCDHGA3	5q31	-2.05047	0.00234317
ENSG00000196526	AFAP	4p16	-2.16549	0.00240558
ENSG00000208179	AC096640.2	NA	-2.02229	0.00253196
ENSG00000116761	CTH	1p31.1	-2.03157	0.00279935
ENSG00000153561	RMND5A	2p11.2	-2.31141	0.00303234
ENSG00000109762	SNX25	4q35.1	-2.80041	0.00318933
ENSG00000182010	PLEKHK1	10q21.2	-2.14174	0.00330627
ENSG00000128965	CHAC1	15q15.1	-2.74151	0.00337007
ENSG00000119280	C1orf198	1q42.13-q43	-2.45389	0.00352054
ENSG00000160200	CBS	21q22.3	-2.30419	0.00376097
ENSG00000206874	SNORD26	NA	-2.74224	0.0039197
ENSG00000136010	ALDH1L2	12q23.3	-2.45283	0.00393082
ENSG00000208797	SNORD73	NA	-2.00064	0.00398945
ENSG00000175899	A2M	12p13.3-p12.3	-6.3381	0.00402508
ENSG00000101255	TRIB3	20p13-p12.2	-2.11988	0.00406147
ENSG00000211455	STK38L	12p11.23	-2.09221	0.00457942
ENSG00000135069	PSAT1	9q21.2	-3.12858	0.00460632
ENSG00000187840	EIF4EBP1	8p12	-2.49599	0.00502457
ENSG00000165983	PTER	10p12	-2.59965	0.00513404
ENSG00000211667	IGLV3-12	NA	-2.25824	0.00534242
ENSG00000214390	NA	NA	-2.64003	0.00554413
ENSG00000091490	AC092436.5	4p15.2	-3.32826	0.00562432
ENSG00000196517	SLC6A9	1p33	-2.01504	0.00586783
ENSG00000154864	FAM38B	18p11.22	-2.02558	0.00588048
ENSG00000162496	DHRS3	1p36.1	-2.16865	0.00589763
ENSG00000153879	CEBPG	19q13.11	-2.16954	0.00595657
ENSG00000138709	LARP2	4q28.2	-2.08728	0.0060902
ENSG00000168738	C18orf58	NA	-2.50203	0.00652465
ENSG00000133026	MYH10	17p13	-2.63666	0.00657383
ENSG00000065911	MTHFD2	2p13.1	-2.64965	0.0067593
ENSG00000207018	NA	NA	-2.41212	0.00677074
ENSG00000213875	AC005019.1	NA	-2.01295	0.00680567
ENSG00000197329	PELI1	2p13.3	-2.24248	0.00760029
ENSG00000171385	KCND3	1p13.3	-2.75684	0.00770059
ENSG00000210572	AC090204.11	NA	-2.70064	0.00771854
ENSG00000214091	AC022443.5	NA	-2.28828	0.00838772
ENSG00000186352	ANKRD37	4q35.1	-2.42169	0.0092782
ENSG00000202056	5S_rRNA	NA	-2.17901	0.00930973
ENSG00000138449	SLC40A1	2q32	-2.61749	0.00960932
D) p-Value < 0,001 FC > 2
ENSEMBL ID	GENESYMBOL	CYTOBAND	FOLD-CHANGE	P-VALUE
ENSG00000214899	C17orf84	NA	3.70877	5.03261e-06
ENSG00000213290	AC010422.7	NA	2.53401	6.42242e-06
ENSG00000203721	C1orf98	NA	5.8964	6.54197e-06
ENSG00000181511	AC011890.4	NA	2.51101	7.3171e-06
ENSG00000212567	SNORA57	NA	3.62453	1.14672e-05
ENSG00000176171	BNIP3	10q26.3	4.69111	1.17728e-05
ENSG00000102144	PGK1	Xq13	4.14105	1.4128e-05
ENSG00000209699	AP001525.6	NA	3.3075	1.51772e-05
ENSG00000121904	CSMD2	1p35.1-p34.3	3.0465	1.53762e-05
ENSG00000208439	AC009358.6	NA	3.17414	1.72256e-05
ENSG00000211442	AP001007.5	NA	8.75783	1.89492e-05
ENSG00000177706	FAM20C	7p22.3	2.42871	1.9742e-05
ENSG00000172137	CALB2	NA	3.11317	2.95561e-05
ENSG00000209039	AC004832.3	NA	5.049	2.9988e-05
ENSG00000135245	AC010655.7	7q32.1	11.9868	3.28904e-05
ENSG00000201638	Y_RNA	NA	3.7142	3.30547e-05
ENSG00000208252	AL445228.13	NA	3.48761	3.33356e-05
ENSG00000099365	STX1B2	16p11.2	2.27319	3.40947e-05
ENSG00000208219	AC097065.2	NA	13.1008	3.67197e-05
ENSG00000164694	FNDC1	6q25	11.6008	3.83404e-05
ENSG00000207611	hsa-mir-149	NA	3.18457	4.21868e-05
ENSG00000105792	C7orf63	7q21.13	2.10249	4.67895e-05
ENSG00000208111	AL672238.1	NA	3.42127	5.24764e-05
ENSG00000064655	EYA2	20q13.1	3.26149	5.25905e-05
ENSG00000201309	Y_RNA	NA	3.0919	5.40044e-05
ENSG00000111674	ENO2	12p13	7.44829	5.41331e-05
ENSG00000206744	U6	NA	5.80962	5.53344e-05
ENSG00000061656	SPAG4	20q11.21	3.1664	5.61833e-05
ENSG00000186918	ZNF395	8p21.1	5.55797	6.05379e-05
ENSG00000207718	hsa-mir-15a	NA	6.18799	6.07183e-05
ENSG00000151151	IPMK	10q21.1	2.3938	7.3755e-05
ENSG00000160305	DIP2A	21q22.3	2.25014	7.40184e-05
ENSG00000160145	KALRN	3q21.1-q21.2	2.27627	7.64079e-05
ENSG00000146938	NLGN4X	Xp22.32-p22.31	3.30573	8.08011e-05
ENSG00000157216	SSBP3	1p32.3	2.04037	8.48008e-05
ENSG00000208766	AL606830.4	NA	3.06142	8.56903e-05
ENSG00000196985	NA	NA	4.15477	8.64211e-05
ENSG00000128655	PDE11A	2q31.2	2.31534	8.64339e-05
ENSG00000104881	PPP1R13L	19q13.32	2.50775	8.69421e-05
ENSG00000109046	WSB1	17q11.1	4.12933	8.9445e-05
ENSG00000168264	IRF2BP2	1q42.3	2.04323	9.02586e-05
ENSG00000178776	C5orf46	5q33.1	2.81726	9.85683e-05
ENSG00000017483	SLC38A5	Xp11.23	5.87097	0.000108745
ENSG00000200170	Y_RNA	NA	4.2217	0.000110697
ENSG00000207189	Y_RNA	NA	3.02404	0.000110816
ENSG00000180393	NA	NA	2.96791	0.000111616
ENSG00000206936	U4	NA	2.97181	0.000118747
ENSG00000163126	ANKRD23	2q11.2	4.6626	0.000131527
ENSG00000089775	ZBTB25	14q23-q24	2.7516	0.00013578
ENSG00000204682	C10orf114	10p12.31	2.19361	0.000148358
ENSG00000107159	CA9	9p13-p12	6.37683	0.000151129
ENSG00000183637	NA	NA	4.26233	0.000151838
ENSG00000214459	AC063976.7	NA	2.96575	0.000157105
ENSG00000088340	AL121586.31	NA	4.13883	0.000158173
ENSG00000208811	AP002981.2	NA	3.1383	0.000161413
ENSG00000127362	TAS2R3	7q31.3-q32	2.28972	0.000163416
ENSG00000149932	TMEM219	16p11.2	2.05223	0.000166451
ENSG00000135750	KCNK1	1q42-q43	2.67069	0.000169357
ENSG00000116883	AL591845.27	1p34.3	4.38018	0.000169881
ENSG00000091428	RAPGEF4	2q31-q32	2.21895	0.000175509
ENSG00000147454	SLC25A37	8p21.2	2.40122	0.000176137
ENSG00000206979	SNORD61	NA	2.74758	0.000182268
ENSG00000162959	MEMO1	2p22-p21	2.1086	0.000192367
ENSG00000006638	TBXA2R	19p13.3	2.26589	0.000193512
ENSG00000210108	AC055869.13	NA	2.2464	0.000199643
ENSG00000163083	INHBB	2cen-q13	2.62161	0.000208048
ENSG00000208243	AC004975.2	NA	2.90687	0.000228102
ENSG00000161681	SHANK1	19q13.3	2.34539	0.000255528
ENSG00000184184	AC026700.5	NA	2.09209	0.000258611
ENSG00000163251	FZD5	2q33-q34	2.19625	0.000259654
ENSG00000214193	C1orf113	1p34.3	3.56146	0.000267438
ENSG00000201376	SNORA70	NA	5.02664	0.000269227
ENSG00000135111	TBX3	12q24.1	4.53823	0.000274225
ENSG00000139364	TMEM132B	12q24.31-q24.32	4.63472	0.000281048
ENSG00000073605	GSDMB	17q12	3.75699	0.000284093
ENSG00000171388	APLN	NA	5.22173	0.000286998
ENSG00000180849	NA	NA	2.39367	0.000292919
ENSG00000208446	AC007687.17	NA	3.49823	0.000299376
ENSG00000141526	SLC16A3	17q25	2.57552	0.000304157
ENSG00000211881	AE000662.1	NA	5.00668	0.000307139
ENSG00000137070	IL11RA	9p13	2.29305	0.000307711
ENSG00000184465	WDR27	6q27	2.01994	0.000310779
ENSG00000140280	LYSMD2	15q21.2	2.00455	0.000326516
ENSG00000124766	SOX4	6p22.3	2.39123	0.000328741
ENSG00000117394	SLC2A1	1p35-p31.3	4.88697	0.000330911
ENSG00000189348	AC092070.2	19q13.41	2.92996	0.000336649
ENSG00000092096	SLC22A17	14q11.2	2.18356	0.000338343
ENSG00000141664	ZCCHC2	18q21.33	3.64156	0.00034203
ENSG00000184795	UNC93B5	NA	4.45758	0.000346489
ENSG00000172938	MRGPRD	11q13.2	2.029	0.000363751
ENSG00000161958	FGF11	17p13.1	2.28811	0.000371363
ENSG00000168681	NA	NA	3.97208	0.000372369
ENSG00000205130	NA	NA	3.16063	0.000372528
ENSG00000060718	COL11A1	1p21	5.33868	0.00037759
ENSG00000130254	SAFB2	19p13.3	2.06336	0.000379355
ENSG00000108175	ZMIZ1	10q22.3	2.13215	0.000380239
ENSG00000099725	PRKY	Yp11.2	5.21836	0.000389243
ENSG00000170525	PFKFB3	10p14-p15	4.18286	0.000390857
ENSG00000007392	LUC7L	16p13.3	2.05965	0.000399878
ENSG00000208363	AC093087.3	NA	2.54543	0.000404285
ENSG00000196094	AC108704.3	NA	4.46504	0.000406314
ENSG00000104321	TRPA1	8q13	6.98833	0.000416806
ENSG00000133135	RNF128	Xq22.3	3.62785	0.000425072
ENSG00000185554	NXF2	NA	2.81975	0.000438937
ENSG00000166396	SERPINB7	18q21.33	4.12033	0.000446754
ENSG00000176222	ZNF404	19q13.31	2.6119	0.000449646
ENSG00000201227	5_8S_rRNA	NA	2.76548	0.000452543
ENSG00000206908	U1	NA	2.52796	0.00045922
ENSG00000211400	AC068594.15	NA	2.33441	0.000461233
ENSG00000060656	PTPRU	1p35.3-p35.1	3.02544	0.000467961
ENSG00000204419	NA	NA	4.1809	0.000473588
ENSG00000132000	PODNL1	19p13.12	2.57701	0.000487581
ENSG00000199649	SNORD59	NA	5.29487	0.000488673
ENSG00000201367	U6	NA	6.59132	0.000500951
ENSG00000156030	C14orf43	14q24.3	2.11031	0.000506436
ENSG00000183196	CHST6	16q22	2.1624	0.000527837
ENSG00000200584	NA	NA	2.73099	0.000532556
ENSG00000212743	AL137145.13	10p15.1	5.78835	0.000536096
ENSG00000186261	AC027277.5	NA	3.43647	0.000543937
ENSG00000123095	BHLHE41	12p11.23-p12.1	3.65418	0.000547036
ENSG00000134954	ETS1	11q23.3	3.22253	0.000548638
ENSG00000208491	AC099397.5	NA	7.34427	0.000550862
ENSG00000118113	MMP8	11q22.3	4.68648	0.000552975
ENSG00000154102	C16orf74	16q24.1	2.0617	0.000559248
ENSG00000199979	Y_RNA	NA	2.88998	0.000577428
ENSG00000207789	hsa-mir-26a-2	NA	2.63679	0.000580027
ENSG00000203632	AC007690.12	NA	3.53002	0.000602203
ENSG00000155511	GRIA1	5q31.1; 5q33	6.44402	0.000621246
ENSG00000100302	RASD2	22q13.1	4.47868	0.000623673
ENSG00000207031	SNORD59	NA	3.02563	0.000627457
ENSG00000006704	GTF2IRD1	7q11.23	2.12252	0.00063046
ENSG00000153707	PTPRD	9p23-p24.3	3.9226	0.000633393
ENSG00000209651	AC006238.1	NA	2.48561	0.000647278
ENSG00000114268	PFKFB4	3p22-p21	4.63445	0.000656919
ENSG00000197561	ELA2	19p13.3	2.10814	0.000660414
ENSG00000104419	NDRG1	8q24.3	4.84743	0.000662599
ENSG00000212979	NA	NA	3.30844	0.000663001
ENSG00000108846	ABCC3	17q22	3.4516	0.000670273
ENSG00000114023	FAM162A	3q21.1	2.94114	0.000670709
ENSG00000121318	TAS2R10	12p13	3.01421	0.000671809
ENSG00000207563	hsa-mir-23b	NA	6.56728	0.000678613
ENSG00000179862	CITED4	1p34.2; 1p35-p34	2.23679	0.000697793
ENSG00000204528	PSORS1C3	NA	2.53348	0.000701603
ENSG00000209637	AP001033.6	NA	3.04226	0.000736449
ENSG00000209626	AC019209.3	NA	3.23269	0.000747413
ENSG00000012817	SMCY	Yq11	8.92994	0.000749133
ENSG00000206152	AC002470.17	22q11.21	2.01735	0.000755263
ENSG00000176945	MUC20	NA	2.4878	0.000779135
ENSG00000101040	PRKCBP1	20q13.12	2.81424	0.000785567
ENSG00000104689	TNFRSF10A	8p21	2.32454	0.000787627
ENSG00000165246	NLGN4Y	NA	3.62372	0.000790757
ENSG00000183878	UTY	NA	6.50554	0.00079511
ENSG00000214252	AC006329.5	NA	2.16902	0.000814468
ENSG00000169021	UQCRFS1	NA	2.07726	0.000815873
ENSG00000213859	KCTD11	17p13.1	3.4163	0.000817998
ENSG00000199851	U3	NA	3.0023	0.000818509
ENSG00000102287	GABRE	Xq28	2.89555	0.000827275
ENSG00000176728	CYorf14	NA	2.17695	0.000832794
ENSG00000207362	U6	NA	3.62091	0.000835588
ENSG00000211640	IGLV6-57	NA	2.51873	0.000841286
ENSG00000214660	AC006015.5	NA	2.87436	0.000847784
ENSG00000164970	C9orf25	9p13.3	2.17726	0.000848542
ENSG00000147145	LPAR4	Xq13-q21.1	2.61689	0.000854939
ENSG00000202422	5S_rRNA	NA	3.07775	0.000862231
ENSG00000211198	AL133223.5	NA	3.39478	0.000875214
ENSG00000142949	PTPRF	1p34	2.51295	0.000878981
ENSG00000130684	ZNF337	20p11.21	2.27208	0.000887571
ENSG00000209971	AC074322.4	NA	2.34075	0.000903178
ENSG00000155897	ADCY8	NA	5.97325	0.000912205
ENSG00000168010	ATG16L2	11q13.4	2.13734	0.000912713
ENSG00000187821	HELT	4q35.1	2.31382	0.000920186
ENSG00000201563	Y_RNA	NA	2.33295	0.000922862
ENSG00000210069	AL139240.9	NA	2.78703	0.000955624
ENSG00000188193	NA	NA	2.45624	0.000965627
ENSG00000200897	SNORD74	NA	2.52858	0.00097685
ENSG00000179954	AC008735.9	NA	2.61351	0.000983186
ENSG00000210401	AL449963.2	NA	3.14512	0.000985569
ENSG00000151640	DPYSL4	10q26	2.58563	0.000986215
ENSG00000101928	MOSPD1	Xq26.3	-3.42685	3.09502e-07
ENSG00000120053	GOT1	10q24.1-q25.1	-3.47896	4.24789e-07
ENSG00000187325	TAF9B	NA	-6.11756	5.42803e-07
ENSG00000162551	ALPL	1p36.12	-5.09589	5.89056e-07
ENSG00000140105	WARS	14q32.31	-3.87195	7.09029e-07
ENSG00000072506	HSD17B10	Xp11.2	-3.73214	7.98879e-07
ENSG00000001630	CYP51A1	7q21.2; 7q21.2-q21.3	-3.36295	1.32098e-06
ENSG00000158985	CDC42SE2	5q31.1	-3.14281	2.3051e-06
ENSG00000115234	SNX17	2p23-p22	-2.45447	2.62218e-06
ENSG00000172893	DHCR7	11q13.2-q13.5	-3.66465	2.63123e-06
ENSG00000165675	ENOX2	Xq25-q26.2	-3.03002	2.80456e-06
ENSG00000198252	STYX	NA	-4.52734	2.91979e-06
ENSG00000120253	NUP43	6q25.1	-3.84418	3.92385e-06
ENSG00000134440	NARS	18q21.2-q21.3	-2.97773	4.03455e-06
ENSG00000132434	LANCL2	7q31.1-q31.33	-6.96548	4.037e-06
ENSG00000067064	IDI1	10p15.3	-6.01155	4.26636e-06
ENSG00000167112	TRUB2	9q34.11	-2.61968	4.46269e-06
ENSG00000130164	LDLR	19p13.3	-8.73897	4.84106e-06
ENSG00000130119	GNL3L	Xp11.22	-3.78706	4.88088e-06
ENSG00000160752	FDPS	1q22	-3.49707	5.38028e-06
ENSG00000204604	ZNF468	19q13.41	-3.51836	5.49757e-06
ENSG00000115561	RNF103	NA	-2.51596	6.42411e-06
ENSG00000115758	ODC1	2p25	-9.30072	7.09596e-06
ENSG00000124299	PEPD	19q12-q13.2	-3.3004	7.25203e-06
ENSG00000105676	ARMC6	19p13.11	-2.39835	7.3396e-06
ENSG00000119328	C9orf6	9q31.3	-2.08591	8.61898e-06
ENSG00000117448	AKR1A1	1p33-p32	-2.74869	8.69256e-06
ENSG00000196305	IARS	9q21	-3.03222	8.95013e-06
ENSG00000099204	ABLIM1	10q25	-3.63761	8.99834e-06
ENSG00000181852	RNF41	12q13.2	-2.69778	9.92791e-06
ENSG00000103018	CYB5B	16q22.1	-3.21383	1.0806e-05
ENSG00000101365	IDH3B	20p13	-2.10378	1.08392e-05
ENSG00000104522	TSTA3	8q24.3	-3.79342	1.09969e-05
ENSG00000100413	POLR3H	22q13.2	-2.26664	1.1003e-05
ENSG00000126953	TIMM8A	Xq22.1	-5.62188	1.12374e-05
ENSG00000052802	SC4MOL	4q32-q34	-7.49409	1.13042e-05
ENSG00000100357	ADSL	22q13.1; 22q13.2	-2.21645	1.15277e-05
ENSG00000146731	CCT6A	7p11.2	-3.69444	1.15768e-05
ENSG00000113161	HMGCR	5q13.3-q14	-6.07685	1.18338e-05
ENSG00000155096	AZIN1	8q22.3	-3.5453	1.20707e-05
ENSG00000185900	AC113191.13	8p11.21	-3.76277	1.23807e-05
ENSG00000114054	PCCB	3q21-q22	-3.22337	1.2668e-05
ENSG00000187446	AC012652.1	15q13.3	-2.68221	1.27078e-05
ENSG00000111652	COPS7A	12p13.31	-2.23347	1.3469e-05
ENSG00000169567	HINT1	5q31.2	-3.04375	1.38129e-05
ENSG00000102743	SLC25A15	13q14	-3.01139	1.43125e-05
ENSG00000112972	HMGCS1	5p14-p13	-6.50943	1.51316e-05
ENSG00000184886	PIGW	17q12	-4.11043	1.51708e-05
ENSG00000137133	HINT2	9p13.3	-2.76872	1.54613e-05
ENSG00000137168	PPIL1	6p21.1	-3.20499	1.56135e-05
ENSG00000145362	ANK2	4q25-q27	-3.00245	1.57181e-05
ENSG00000187778	MCRS1	12q13.12	-2.71948	1.57286e-05
ENSG00000198860	TSEN15	1q25	-2.73934	1.71023e-05
ENSG00000146733	PSPH	7p15.2-p15.1	-3.87535	1.75339e-05
ENSG00000185813	PCYT2	17q25.3	-2.2606	1.87821e-05
ENSG00000132570	PCBD2	5q31.1	-2.30511	1.88625e-05
ENSG00000123505	AMD1	6q21-q22	-3.84296	1.9037e-05
ENSG00000107669	ATE1	10q26.13	-2.76224	1.92824e-05
ENSG00000092607	TBX15	1p11.1	-2.52446	2.02067e-05
ENSG00000144283	PK4P	2q23-q31	-3.44566	2.11333e-05
ENSG00000136144	RCBTB1	13q14	-3.54544	2.13999e-05
ENSG00000065150	IPO5	13q32.2	-3.1315	2.26703e-05
ENSG00000147862	NFIB	9p24.1	-5.77161	2.40507e-05
ENSG00000124702	KLHDC3	6p21.1	-2.64011	2.40749e-05
ENSG00000144043	TEX261	2p13.3	-2.43497	2.52064e-05
ENSG00000115902	SLC1A4	2p15-p13	-3.88786	2.52836e-05
ENSG00000114999	TTL	2q13	-2.76081	2.62045e-05
ENSG00000169740	ZNF32	10q22-q25	-2.8501	2.6332e-05
ENSG00000126005	EIF6	20q12	-2.37536	2.6691e-05
ENSG00000104343	UBE2W	8q21.11	-3.07123	2.70776e-05
ENSG00000214736	TOMM6	6p21.31	-2.81948	2.73439e-05
ENSG00000198431	TXNRD1	12q23-q24.1	-4.81227	2.78459e-05
ENSG00000156253	C21orf6	21q22.11	-2.8744	2.80465e-05
ENSG00000079459	FDFT1	8p23.1-p22	-3.92513	2.82114e-05
ENSG00000166986	MARS	12q13.2	-2.47695	2.82987e-05
ENSG00000213189	AC010093.8	NA	-4.2431	2.84492e-05
ENSG00000162377	C1orf163	1p32.3	-3.16048	2.9945e-05
ENSG00000163249	CCNYL1	2q33.3	-2.68831	3.13355e-05
ENSG00000120437	ACAT2	6q25.3	-4.30115	3.1418e-05
ENSG00000108439	PNPO	17q21.32	-2.51414	3.19573e-05
ENSG00000128626	MRPS12	19q13.1-q13.2	-2.44142	3.25653e-05
ENSG00000116133	DHCR24	1p33-p31.1	-5.22481	3.31307e-05
ENSG00000111641	NOP2	12p13	-2.6353	3.33569e-05
ENSG00000108395	TRIM37	17q23.2	-2.49812	3.36094e-05
ENSG00000168803	ADAL	15q15.3	-2.97641	3.40559e-05
ENSG00000147419	CCDC25	8p21.1	-2.9109	3.41353e-05
ENSG00000115109	EPB41L5	2q14.2	-3.14603	3.56207e-05
ENSG00000160991	ORAI2	7q22.1	-2.43848	3.62384e-05
ENSG00000198911	SREBF2	22q13	-2.49095	3.74509e-05
ENSG00000171202	TMEM126A	11q14.1	-3.42562	3.76809e-05
ENSG00000115946	PNO1	2p14	-3.96598	3.96903e-05
ENSG00000166411	IDH3A	15q25.1-q25.2	-3.05966	4.09135e-05
ENSG00000213977	TAX1BP3	17p13	-3.10298	4.26631e-05
ENSG00000132591	ERAL1	17q11.2	-2.12159	4.51902e-05
ENSG00000055070	C1orf144	1p36.13	-2.35184	4.72216e-05
ENSG00000109919	MTCH2	11p11.2	-2.27933	4.92921e-05
ENSG00000138449	SLC40A1	2q32	-7.98358	4.94372e-05
ENSG00000065457	ADAT1	16q23.1	-2.96506	4.98167e-05
ENSG00000156697	UTP14A	Xq25	-2.92748	4.99478e-05
ENSG00000133706	LARS	5q32	-3.33262	5.03172e-05
ENSG00000160049	DFFA	1p36.3-p36.2	-2.1695	5.04451e-05
ENSG00000170633	RNF34	12q24.31	-2.04735	5.05746e-05
ENSG00000163754	GYG1	3q24-q25.1	-2.81743	5.07111e-05
ENSG00000105393	C19orf62	19p13.11	-2.13096	5.22609e-05
ENSG00000198538	ZNF28	19q	-2.6718	5.23037e-05
ENSG00000165669	C10orf84	10q26.11	-2.08116	5.23394e-05
ENSG00000138442	WDR12	2q33.1	-2.94376	5.30628e-05
ENSG00000153956	CACNA2D1	7q21-q22	-8.21353	5.34509e-05
ENSG00000133316	WDR74	NA	-2.19947	5.45673e-05
ENSG00000136718	IMP4	2q21.1	-2.25253	5.46453e-05
ENSG00000184655	AC096645.2	NA	-3.25974	5.49678e-05
ENSG00000132603	NIP7	16q22.1	-2.51054	5.51494e-05
ENSG00000135999	EPC2	2q23.1	-2.94865	5.67177e-05
ENSG00000084090	STARD7	2q11.2	-2.24676	6.08551e-05
ENSG00000179950	PUF60	8q24.2-qter	-2.3666	6.08583e-05
ENSG00000111481	COPZ1	12q13.2-q13.3	-2.67826	6.13566e-05
ENSG00000130713	EXOSC2	9q34	-2.92419	6.50033e-05
ENSG00000160211	G6PD	Xq28	-2.77634	6.62042e-05
ENSG00000127540	UQCR	19p13.3	-2.38954	6.67605e-05
ENSG00000069956	MAPK6	15q21	-2.47534	6.8198e-05
ENSG00000107951	MTPAP	10p11.23	-2.89114	6.82226e-05
ENSG00000198356	ASNA1	19q13.3	-2.4463	6.91974e-05
ENSG00000215301	DDX3X	Xp11.3-p11.23	-2.18552	7.06231e-05
ENSG00000174442	ZWILCH	15q22.31	-5.39123	7.08572e-05
ENSG00000162623	TYW3	1p31.1	-3.45911	7.0919e-05
ENSG00000100714	MTHFD1	14q24	-2.86288	7.16022e-05
ENSG00000106355	LSM5	7p14.3	-3.73492	7.4068e-05
ENSG00000129480	C14orf126	14q12	-2.94213	7.49383e-05
ENSG00000013275	PSMC4	NA	-2.51433	7.50068e-05
ENSG00000116199	FAM20B	1q25	-3.15002	7.6972e-05
ENSG00000186328	RP11-140K17.2	NA	-3.12261	7.80889e-05
ENSG00000198042	MAK16	8p12	-3.79102	7.98118e-05
ENSG00000119705	C14orf156	14q24.3	-2.29467	8.0918e-05
ENSG00000133935	C14orf1	14q24.3	-3.26221	8.19683e-05
ENSG00000148110	HIATL1	9q22.32	-3.27927	8.22571e-05
ENSG00000143575	HAX1	1q21.3	-3.28363	8.24846e-05
ENSG00000148153	C9orf80	9q32	-2.12418	8.32761e-05
ENSG00000130348	QRSL1	6q21	-2.44574	8.33325e-05
ENSG00000176087	SLC35A4	5q31.3	-2.51898	8.74721e-05
ENSG00000065060	UHRF1BP1	6p21	-2.06431	8.85102e-05
ENSG00000136261	BZW2	7p21.1	-3.48887	8.99648e-05
ENSG00000144635	DYNC1LI1	3p22.3	-2.54726	9.02925e-05
ENSG00000133731	IMPA1	8q21.13-q21.3	-3.50017	9.40063e-05
ENSG00000165832	TRUB1	10q25.3	-2.56168	9.57492e-05
ENSG00000198876	WDR40A	9p13.3	-2.37988	9.71653e-05
ENSG00000145391	SETD7	4q28	-4.37159	9.75795e-05
ENSG00000149428	HYOU1	11q23.1-q23.3	-3.38325	9.819e-05
ENSG00000116237	ICMT	1p36.21	-2.0917	9.87031e-05
ENSG00000149346	C20orf94	20p12.2	-2.59834	9.94611e-05
ENSG00000013503	POLR3B	12q23.3	-3.16251	0.000101174
ENSG00000105447	GRWD1	19q13.32	-2.04307	0.000101641
ENSG00000147383	NSDHL	Xq28	-2.36549	0.000104943
ENSG00000143493	INTS7	1p36.13-q42.3	-4.10451	0.000105969
ENSG00000066855	MTFR1	8q13.1	-3.66772	0.000107601
ENSG00000141076	CIRH1A	16q22.1	-2.34159	0.000108778
ENSG00000171865	RNASEH1	2p25	-2.68751	0.000110992
ENSG00000100296	THOC5	22q12.2	-2.15666	0.00011136
ENSG00000163683	C4orf34	4p14	-3.68867	0.000112236
ENSG00000116120	FARSLB	2q36.1	-4.18558	0.00011442
ENSG00000104341	LAPTM4B	8q22.1	-2.95119	0.000116681
ENSG00000156256	USP16	21q22.11	-2.90546	0.000116813
ENSG00000114648	KLHL18	3p21.31	-2.18753	0.000117807
ENSG00000159131	GART	21q22.1; 21q22.11	-2.73526	0.000119038
ENSG00000152332	UHMK1	1q23.3	-2.53779	0.000119922
ENSG00000173163	COMMD1	2p15	-2.93064	0.000120301
ENSG00000184500	PROS1	3q11.2	-2.41812	0.000121283
ENSG00000177600	RPLP2	11p15.5-p15.4	-2.21853	0.000122039
ENSG00000104549	SQLE	8q24.1	-4.09192	0.000122919
ENSG00000135763	KIAA0133	1q42.13	-2.48568	0.000124082
ENSG00000215570	AL136219.17	NA	-4.45757	0.000128441
ENSG00000100461	RBM23	14q11.2	-2.21612	0.000128878
ENSG00000138190	EXOC6	10q23.33	-3.71647	0.000129333
ENSG00000115350	POLE4	2p12	-2.57742	0.000131199
ENSG00000172123	SLFN12	17q12	-3.45597	0.000134272
ENSG00000182400	TRAPPC6B	14q21.1	-3.14721	0.000135765
ENSG00000123609	NMI	2q23	-2.86588	0.000136059
ENSG00000104691	UBXN8	8p12-p11.2	-3.07894	0.000137139
ENSG00000101361	NOL5A	20p13	-2.42514	0.000141678
ENSG00000104687	GSR	8p21.1	-2.20487	0.000143042
ENSG00000196922	ZNF252	NA	-4.06963	0.000143337
ENSG00000102317	RBM3	Xp11.2	-2.45683	0.000145901
ENSG00000197025	ZNF542	NA	-2.47531	0.000147189
ENSG00000120159	C9orf82	9p21.2	-2.10301	0.000147246
ENSG00000181924	CHCHD8	11q13.4	-2.12245	0.000149858
ENSG00000160818	GPATCH4	1q22	-2.71752	0.000151715
ENSG00000183665	TRMT12	8q24.13	-2.80979	0.000151954
ENSG00000100897	WDR23	14q12	-2.0187	0.000153172
ENSG00000214139	NA	NA	-3.6485	0.000153252
ENSG00000100462	PRMT5	14q11.2-q21	-2.10953	0.000153794
ENSG00000168497	SDR	2q32-q33	-3.52961	0.000153897
ENSG00000164338	UTP15	5q13.2	-3.90998	0.000156319
ENSG00000162999	DUSP19	2q32.1	-2.34868	0.000158352
ENSG00000144840	RABL3	3q13.33	-2.97016	0.000159884
ENSG00000120658	ENOX1	13q14.11	-2.33091	0.000161634
ENSG00000198791	CNOT7	8p22-p21.3	-2.80654	0.000165345
ENSG00000132963	POMP	13q12.3	-2.06528	0.000166103
ENSG00000179241	LDLRAD3	11p13	-2.25473	0.000166608
ENSG00000187097	ENTPD5	14q24	-2.27002	0.000167006
ENSG00000053770	C14orf108	14q23.1	-2.57955	0.000168287
ENSG00000147164	SNX12	Xq13.1	-2.09259	0.000170296
ENSG00000078177	N4BP2	4p14	-3.17544	0.000173053
ENSG00000175899	A2M	12p13.3-p12.3	-21.1091	0.000174336
ENSG00000150756	FAM173B	5p15.2	-2.60309	0.000175899
ENSG00000142507	PSMB6	17p13	-3.63816	0.000176598
ENSG00000213246	SUPT4H1	17q21-q23	-2.16788	0.000177547
ENSG00000065833	ME1	6q12	-3.87018	0.000177606
ENSG00000188725	C5orf43	5q12.1	-2.62766	0.000179722
ENSG00000165874	FAM35A	10q23.2	-2.7607	0.0001805
ENSG00000158483	FAM86C	11q13.4	-2.30909	0.000181254
ENSG00000116688	MFN2	1p36.22	-2.14887	0.000181323
ENSG00000165732	DDX21	10q21	-2.97618	0.000184741
ENSG00000198301	SDAD1	4q21.1	-3.44719	0.000186407
ENSG00000095574	IKZF5	10q26	-2.21706	0.000187722
ENSG00000110700	RPS13	11p15	-5.53719	0.000190684
ENSG00000209199	AC011118.13	NA	-4.61798	0.000190717
ENSG00000119725	ZNF410	14q24.3	-2.33112	0.000191061
ENSG00000104381	GDAP1	8q21.11	-2.61056	0.000196139
ENSG00000154642	C21orf91	21q21.1	-3.45584	0.000196471
ENSG00000086189	DIMT1L	5q11-q14	-2.81152	0.000200601
ENSG00000151576	QTRTD1	3q13.31	-2.46138	0.000202798
ENSG00000131467	PSME3	17q21	-2.59	0.000203821
ENSG00000170802	FOXN2	2p22-p16	-2.38594	0.000206488
ENSG00000138074	SLC5A6	2p23	-2.3404	0.000207401
ENSG00000106692	FKTN	9q31-q33	-3.1112	0.000210443
ENSG00000163684	RPP14	3p14.3	-2.90907	0.000211414
ENSG00000143222	UFC1	1q23.3	-2.61466	0.000212054
ENSG00000081014	AP4E1	15q21.2	-2.62924	0.000214536
ENSG00000115827	C2orf37	2q31.1	-2.4615	0.000214833
ENSG00000113387	SUB1	5p13.3	-2.68553	0.000217395
ENSG00000124333	VAMP7	Xq28; Yq12	-2.43779	0.000218276
ENSG00000180771	AP001264.4	NA	-2.0823	0.000219031
ENSG00000166226	CCT2	12q15	-2.50115	0.000221733
ENSG00000167720	SRR	17p13	-2.99976	0.000230755
ENSG00000185414	MRPL30	2q11.2	-2.62592	0.000234532
ENSG00000053372	MRTO4	1p36.13	-2.38516	0.000238556
ENSG00000123106	CCDC91	12p11.22	-2.37079	0.000238658
ENSG00000136868	SLC31A1	9q31-q32	-2.15081	0.000239887
ENSG00000114302	PRKAR2A	3p21.3-p21.2	-2.48546	0.000242515
ENSG00000149313	AASDHPPT	11q22	-2.3478	0.000244314
ENSG00000169230	PRELID1	5q35.3	-3.58384	0.000244381
ENSG00000197747	S100A10	1q21	-2.4737	0.000245272
ENSG00000104643	MTMR9	8p23-p22	-2.23275	0.000246902
ENSG00000006530	AGK	7q34	-2.35497	0.000251275
ENSG00000185238	PRMT3	11p15.1	-2.62134	0.000251958
ENSG00000171566	PLRG1	4q31.2-q32.1	-2.70747	0.000253019
ENSG00000153561	RMND5A	2p11.2	-3.57638	0.000254641
ENSG00000111906	HDDC2	6q13-q24.3	-3.17208	0.000256581
ENSG00000148429	USP6NL	10p13	-2.09341	0.000258773
ENSG00000168883	USP39	2p11.2	-2.2232	0.000260618
ENSG00000115993	TRAK2	2q33	-2.42592	0.000261291
ENSG00000213399	AC022210.8	NA	-2.73067	0.000262514
ENSG00000150753	CCT5	5p15.2	-2.89079	0.000265335
ENSG00000112578	BYSL	6p21.1	-2.42527	0.000265898
ENSG00000137513	NARS2	11q14.1	-2.20226	0.000268324
ENSG00000077232	DNAJC10	2q32.1	-3.90316	0.000268518
ENSG00000120694	HSPH1	13q12.3	-4.02559	0.000268699
ENSG00000151116	UEVLD	11p15.1	-2.26837	0.000273478
ENSG00000117592	PRDX6	1q25.1	-2.80905	0.000275682
ENSG00000167468	GPX4	19p13.3	-2.5326	0.000281562
ENSG00000122694	GLIPR2	9p13-p12	-3.8442	0.000283027
ENSG00000104320	NBN	8q21	-3.51619	0.000283753
ENSG00000087263	OGFOD1	16q13	-2.79215	0.000286976
ENSG00000087470	DNM1L	12p11.21	-3.19036	0.000292787
ENSG00000125249	RAP2A	13q34	-2.07603	0.000295463
ENSG00000212981	NA	NA	-2.05998	0.000302985
ENSG00000169288	MRPL1	4q21.1	-2.46967	0.000305618
ENSG00000107937	GTPBP4	10p15-p14	-2.39842	0.000312991
ENSG00000141642	ELAC1	18q21	-2.43013	0.000313197
ENSG00000120800	UTP20	NA	-2.63123	0.000317444
ENSG00000147601	TERF1	NA	-2.31917	0.000320206
ENSG00000105669	COPE	19p13.11	-2.30021	0.000329042
ENSG00000213569	AL390039.10	NA	-4.60938	0.000331397
ENSG00000164172	MOCS2	5q11	-2.36595	0.000334213
ENSG00000116455	WDR77	1p13.2	-2.82903	0.00033486
ENSG00000166913	YWHAB	20q13.1	-2.28381	0.000338814
ENSG00000198833	NCUBE1	6q15	-2.49138	0.000341172
ENSG00000120438	TCP1	6q25.3-q26	-2.30486	0.000345157
ENSG00000105968	H2AFV	7p13	-2.50006	0.000347341
ENSG00000120509	PDZD11	Xq13.1	-2.17256	0.000348175
ENSG00000086475	SEPHS1	10p14	-2.28871	0.000350837
ENSG00000050393	CCDC90A	6p24.3-p23	-2.16479	0.000353429
ENSG00000214185	AL035458.35	NA	-2.21823	0.000357725
ENSG00000109586	GALNT7	4q31.1	-3.12068	0.000359778
ENSG00000163577	EIF5A2	3q26.2	-2.48815	0.000360469
ENSG00000134900	TPP2	13q32-q33	-2.0929	0.000366347
ENSG00000164323	KIAA1430	4q35.1	-2.44844	0.000369003
ENSG00000145912	NOLA2	5q35.3	-2.50982	0.000370613
ENSG00000135521	LTV1	6q24.2	-3.053	0.000375705
ENSG00000196368	NUDT11	Xp11.22	-2.06959	0.000382457
ENSG00000182628	FAM33A	NA	-4.47512	0.0003888
ENSG00000013561	RNF14	5q23.3-q31.1	-2.86587	0.000391359
ENSG00000134001	EIF2S1	14q23.3	-2.2594	0.000394348
ENSG00000144815	FAM55C	3q12.3	-3.30312	0.000397368
ENSG00000170854	MINA	3q11.2	-2.1752	0.000399784
ENSG00000111845	PAK1IP1	6p24.2	-2.69766	0.000406967
ENSG00000139726	DENR	12q24.31	-2.32681	0.000411157
ENSG00000067208	EVI5	1p22.1	-3.34418	0.000415897
ENSG00000108061	SHOC2	10q25	-2.14504	0.000417495
ENSG00000100591	AHSA1	14q24	-2.33577	0.00042337
ENSG00000010165	KIAA0859	1q24-q25.3	-2.14873	0.000424397
ENSG00000137502	RAB30	11q12-q14	-3.24739	0.000425076
ENSG00000157823	AP3S2	15q26.1	-2.3548	0.000425582
ENSG00000133687	TMTC1	12p11.22	-7.67494	0.000425672
ENSG00000198034	RPS4X	Xq13.1	-2.03557	0.000425954
ENSG00000138698	RAP1GDS1	4q23-q25	-2.24875	0.000428933
ENSG00000197961	ZNF121	19p	-2.07457	0.000434096
ENSG00000135842	FAM129A	1q25	-4.48917	0.000435226
ENSG00000135624	CCT7	2p13.2	-2.20517	0.000435913
ENSG00000110060	PUS3	11q24.2	-2.0393	0.000436667
ENSG00000135446	CDK4	12q14	-2.05762	0.000437312
ENSG00000100983	GSS	20q11.2	-2.03345	0.000443697
ENSG00000171466	ZNF562	19p13.2	-2.13086	0.000445234
ENSG00000101557	USP14	18p11.32	-2.30542	0.00044879
ENSG00000165271	NOL6	9p13.3	-2.0013	0.00045126
ENSG00000163093	BBS5	2q31.1	-2.33498	0.00045448
ENSG00000048162	NOP16	5q35.2	-2.50423	0.000455308
ENSG00000189180	ZNF33A	10p11.2	-2.24969	0.000461357
ENSG00000164332	UBLCP1	5q33.3	-3.61618	0.000466676
ENSG00000213465	ARL2	11q13	-2.54889	0.000476469
ENSG00000166197	NOLC1	10q24.32	-2.58278	0.00049389
ENSG00000198618	PPIAL3	NA	-2.66173	0.000494092
ENSG00000082153	BZW1	NA	-2.83907	0.000505951
ENSG00000099817	POLR2E	19p13.3	-2.03258	0.000506945
ENSG00000164342	TLR3	4q35	-4.65326	0.000508042
ENSG00000103051	COG4	16q22.1	-2.01322	0.000510272
ENSG00000177479	ARIH2	3p21.2-p21.3	-2.09216	0.000522825
ENSG00000116030	SUMO1	2q33	-2.22361	0.000523651
ENSG00000119838	AC016734.7	NA	-2.65672	0.000524523
ENSG00000131238	PPT1	1p32	-2.92987	0.000528846
ENSG00000167863	ATP5H	17q25	-2.02201	0.000541036
ENSG00000100221	JOSD1	22q13.1	-2.38238	0.000545399
ENSG00000111912	ESNA1	6q22.31-q22.32	-3.74939	0.000545922
ENSG00000162607	USP1	1p31.3	-2.52105	0.000548569
ENSG00000124275	MTRR	5p15.3-p15.2	-2.88007	0.000550857
ENSG00000157819	AL021920.1	NA	-4.88352	0.000554871
ENSG00000007923	DNAJC11	1p36.31	-2.13241	0.000556502
ENSG00000143870	PDIA6	2p25.1	-2.08199	0.000556908
ENSG00000005889	ZFX	Xp21.3	-2.18438	0.000557481
ENSG00000138381	ASNSD1	2p24.3-q21.3	-2.27908	0.000561535
ENSG00000012232	EXTL3	8p21	-2.317	0.00056874
ENSG00000164163	ABCE1	4q31	-3.09807	0.00056892
ENSG00000085760	MTIF2	2p14-p16	-2.43354	0.000572723
ENSG00000103591	AC012568.7	15q22.33-q23	-2.08402	0.000576341
ENSG00000183520	UTP11L	1p34.3	-2.78507	0.000576844
ENSG00000149100	EIF3M	11p13	-2.01689	0.000590587
ENSG00000112667	C6orf108	6p21.1	-2.06162	0.000593625
ENSG00000124120	TTPAL	20q13.12	-2.87912	0.000595936
ENSG00000172339	ALG14	1p21.3	-2.36764	0.000599389
ENSG00000156875	HIAT1	1p21.2	-2.22635	0.000599492
ENSG00000066322	ELOVL1	1p34.2	-2.41139	0.000600286
ENSG00000179958	DCTPP1	16p11.2	-3.11243	0.000605173
ENSG00000166401	SERPINB8	18q21.3	-2.12531	0.000607774
ENSG00000086200	IPO11	5q12.1	-2.63924	0.00061079
ENSG00000155097	ATP6V1C1	8q22.3	-3.22403	0.00061204
ENSG00000131844	MCCC2	5q12-q13	-2.56277	0.000617495
ENSG00000171612	SLC25A33	1p36.22	-4.64451	0.00062057
ENSG00000196785	Z79996.2	NA	-2.92224	0.000629608
ENSG00000144867	SRPRB	3q22.1	-2.85257	0.000635518
ENSG00000128928	IVD	15q14-q15	-2.55893	0.000643579
ENSG00000181594	NA	NA	-2.30162	0.000643919
ENSG00000074582	BCS1L	2q33	-2.526	0.000645662
ENSG00000184182	UBE2F	2q37.3	-2.46936	0.000647079
ENSG00000166181	API5	11p11.2	-2.2883	0.000647114
ENSG00000119787	ARL6IP2	2p22.2-p22.1	-2.53388	0.000647119
ENSG00000118961	C2orf43	2p24.1	-2.71509	0.00064825
ENSG00000198464	ZNF480	19q13.33	-3.02478	0.000653165
ENSG00000136628	EPRS	1q41-q42	-2.61108	0.000657704
ENSG00000166479	TXNDC10	18q22	-2.5706	0.000660763
ENSG00000013297	CLDN11	3q26.2-q26.3	-2.90065	0.00066626
ENSG00000117505	DR1	1p22.1	-2.14648	0.000670676
ENSG00000108592	FTSJ3	17q23.3	-2.03118	0.000674439
ENSG00000119487	MAPKAP1	9q33.3	-2.01934	0.000676607
ENSG00000172531	PPP1CA	11q13	-2.20628	0.000679349
ENSG00000105058	FAM32A	19pter-p13.3	-2.13595	0.000684837
ENSG00000145022	TCTA	3p21	-2.21452	0.000688219
ENSG00000134375	TIMM17A	1q32.1	-3.64441	0.000690463
ENSG00000171793	CTPS	1p34.1	-3.97681	0.000691324
ENSG00000114030	KPNA1	3q21	-2.20265	0.000695364
ENSG00000139291	TMEM19	12q21.1	-2.58242	0.000696349
ENSG00000170445	HARS	5q31.3	-2.04415	0.000707568
ENSG00000181061	HIGD1A	NA	-3.18129	0.000708707
ENSG00000087053	MTMR2	11q22	-2.23951	0.000732577
ENSG00000167842	MIS12	17p13.2	-2.35646	0.000735047
ENSG00000176276	AC113404.3	5q13.3	-3.56103	0.000735539
ENSG00000122783	C7orf49	7q33	-2.33052	0.00073856
ENSG00000005100	DHX33	17p13.2	-2.26972	0.000745617
ENSG00000079785	DDX1	2p24	-2.58932	0.000753701
ENSG00000144468	RHBDD1	2q36.3	-2.00403	0.000753941
ENSG00000152944	MED21	12p11.23	-2.92064	0.000754091
ENSG00000154582	TCEB1	NA	-2.1219	0.000761336
ENSG00000162851	TFB2M	1q44	-2.40957	0.000764852
ENSG00000137547	MRPL15	8q11.2-q13	-3.37446	0.000770112
ENSG00000164038	NHEDC2	4q24	-2.92726	0.000771505
ENSG00000129255	MPDU1	17p13.1-p12	-2.03107	0.000771524
ENSG00000196655	TRAPPC4	11q23.3	-2.26914	0.000776644
ENSG00000198015	MRPL42	12q22	-2.65961	0.000776761
ENSG00000152380	FAM151B	5q14.1	-2.62647	0.000777521
ENSG00000114405	C3orf14	3p14.2	-3.17719	0.000782818
ENSG00000151012	SLC7A11	4q28-q32	-7.1615	0.000789836
ENSG00000161057	PSMC2	7q22.1-q22.3	-2.29494	0.000790308
ENSG00000068784	SRBD1	2p21	-2.63392	0.000793974
ENSG00000167970	AC009065.8	NA	-3.3658	0.000804213
ENSG00000147224	PRPS1	NA	-4.21059	0.000806414
ENSG00000121766	ZCCHC17	1p35.2	-2.37256	0.000808862
ENSG00000186446	ZNF501	3p21.31	-2.05486	0.000809013
ENSG00000166164	BRD7	16q12	-2.28392	0.000815486
ENSG00000101773	RBBP8	18q11.2	-2.94846	0.000817568
ENSG00000173692	PSMD1	2q37.1	-2.92561	0.000819107
ENSG00000162441	LZIC	1p36.22	-2.09336	0.000819635
ENSG00000203778	C6orf225	6q21	-3.02954	0.000832374
ENSG00000070669	ASNS	7q21.3	-3.08982	0.000834237
ENSG00000136997	MYC	8q24.21	-2.82358	0.000837129
ENSG00000012963	UBR7	14q32.12	-2.40801	0.000838962
ENSG00000116649	SRM	1p36-p22	-2.70671	0.000844643
ENSG00000169193	CCDC126	7p15.3	-2.38706	0.000844698
ENSG00000121067	SPOP	17q21.33	-2.19246	0.000848907
ENSG00000114126	TFDP2	3q23	-2.52134	0.000868389
ENSG00000170876	TMEM43	3p25.1	-2.07388	0.000868646
ENSG00000147400	CETN2	Xq28	-2.45698	0.000873044
ENSG00000143179	UCK2	1q23	-2.00667	0.000875811
ENSG00000119285	HEATR1	1q43	-2.76745	0.000881374
ENSG00000185728	YTHDF3	8q12.3	-2.42041	0.00088158
ENSG00000091127	PUS7	7q22.2	-2.62547	0.000885548
ENSG00000156467	UQCRB	NA	-2.43392	0.000888004
ENSG00000134198	TSPAN2	1p13.2	-2.39785	0.000891045
ENSG00000085832	EPS15	1p32	-2.28288	0.000907286
ENSG00000111667	USP5	12p13	-2.45449	0.000915356
ENSG00000162408	NOL9	1p36.31	-2.49076	0.000918384
ENSG00000129691	ASH2L	8p11.2	-2.38121	0.000932553
ENSG00000113575	PPP2CA	5q31.1	-2.24982	0.000934964
ENSG00000180008	SOCS4	14q22.3	-2.46513	0.000936258
ENSG00000136897	MRPL50	9q31.1	-2.06386	0.000938202
ENSG00000116898	MRPS15	1p35-p34.1	-2.30266	0.00094318
ENSG00000163636	PSMD6	3p14.1	-2.13513	0.000945101
ENSG00000163607	GTPBP8	3q13.2	-2.56513	0.000948503
ENSG00000108587	GOSR1	17q11	-2.15416	0.000952103
ENSG00000174780	SRP72	4q11	-2.21666	0.000953994
ENSG00000169981	ZNF35	3p22-p21	-2.85056	0.000961191
ENSG00000166451	CENPN	16q23.2	-4.36871	0.000961585
ENSG00000137760	ALKBH8	11q22.3	-2.58531	0.000966848
ENSG00000146223	RPL7L1	NA	-2.40883	0.000972796
ENSG00000180694	TMEM64	8q21.3	-2.66869	0.000973299
ENSG00000180628	PCGF5	10q23.32	-2.1679	0.000984151
ENSG00000198373	WWP2	16q22.1	-2.16809	0.00098699
ENSG00000183671	GPR1	2q33.3	-4.14664	0.000989472
ENSG00000069849	ATP1B3	3q23	-2.49	0.000990453
ENSG00000151881	C5orf28	5p12	-2.77259	0.000995924
ENSG00000124380	SNRNP27	2p14	-2.61159	0.000998998
