# Supplementary material for: Expression Profiling of FSHD-1 and FSHD-2 Cells during Myogenic Differentiation Evidences Common and Distinctive Gene Dysregulation Patterns
Source: PLoS One. 2011 Jun 13;6(6):e20966. doi: 10.1371/journal.pone.0020966 (PMC3113851; doi:10.1371/journal.pone.0020966)
Supplement: Table S2 — DAVID classification of biological processes significantly enriched in the set of genes differentially expressed in FSHD-1 and FSHD-2 myoblasts (A and B) and in FSHD-1 and FSHD-2 myotubes (C and D). (XLS) [file pone.0020966.s002.xls]

## Sheet: S2 A)
Table S2: DAVID classification of biological processes significantly enriched in the set of gene differentially expressed in A) FSHD-1 myoblasts, B) FSHD-2 myoblasts, C) FSHD-1 myotubes, D) FSHD-2 myotubes.
(P < 0.05)
A)
Term	Count	%	P-Value	Fold Enrichment
Cell cycle	94	26.6	5e-48	6
M phase	65	18.4	1.8e-45	9.9
Cell cycle phase	70	19.8	1.9e-44	8.4
Cell cycle process	77	21.8	3e-42	6.8
M phase of mitotic cell cycle	51	14.4	1.8e-38	11.4
Nuclear division	50	14.2	1.2e-37	11.3
Mitosis	50	14.2	1.2e-37	11.3
Organelle fission	50	14.2	9.2e-37	10.9
Mitotic cell cycle	58	16.4	1.3e-34	7.8
DNA metabolic process	65	18.4	1.1e-33	6.4
Cell division	52	14.7	1.9e-33	8.8
DNA replication	44	12.5	2.3e-33	11.6
Organelle organization	83	23.5	2.1e-21	3.1
Response to DNA damage stimulus	42	11.9	2.7e-19	5.6
Chromosome segregation	22	6.2	4.3e-18	13.5
Cellular component organization	111	31.4	8.5e-18	2.2
DNA-dependent DNA replication	19	5.4	3.1e-17	16.3
DNA repair	33	9.3	1.7e-15	5.8
Regulation of cell cycle	34	9.6	2.1e-14	5.1
Cellular response to stress	43	12.2	1.5e-13	3.8
Regulation of mitotic cell cycle	22	6.2	2.8e-12	7.2
Regulation of cell cycle process	18	5.1	1e-10	7.9
Cell cycle checkpoint	16	4.5	3.1e-10	8.8
Mitotic sister chromatid segregation	11	3.1	1.4e-09	15.2
Microtubule-based process	24	6.8	1.4e-09	4.7
Cellular response to stimulus	45	12.7	1.7e-09	2.7
Sister chromatid segregation	11	3.1	1.9e-09	14.8
Chromosome organization	33	9.3	2.8e-09	3.4
Microtubule cytoskeleton organization	18	5.1	5.8e-09	6.1
Meiosis	15	4.2	8.5e-09	7.6
M phase of meiotic cell cycle	15	4.2	8.5e-09	7.6
Meiotic cell cycle	15	4.2	1.1e-08	7.5
Spindle organization	11	3.1	1.5e-08	12.2
Cellular process	249	70.5	2e-08	1.2
Double-strand break repair	12	3.4	3.4e-08	9.7
DNA packaging	15	4.2	8.5e-08	6.4
Mitotic cell cycle checkpoint	10	2.8	1.4e-07	11.6
Cell proliferation	28	7.9	1.9e-07	3.2
Macromolecular complex subunit organization	36	10.2	7.2e-07	2.5
Macromolecular complex assembly	34	9.6	1.3e-06	2.6
Cellular component assembly	39	11	6.8e-06	2.2
Response to stress	60	17	1e-05	1.8
Protein-DNA complex assembly	11	3.1	1.3e-05	6
Regulation of DNA metabolic process	12	3.4	1.7e-05	5.3
Cellular component biogenesis	41	11.6	2e-05	2
Interphase of mitotic cell cycle	11	3.1	4e-05	5.3
DNA recombination	11	3.1	4.7e-05	5.2
Interphase	11	3.1	5.1e-05	5.2
Phosphoinositide-mediated signaling	10	2.8	6.4e-05	5.7
Cytoskeleton organization	23	6.5	6.6e-05	2.6
Protein complex biogenesis	25	7.1	7.9e-05	2.5
Protein complex assembly	25	7.1	7.9e-05	2.5
Regulation of organelle organization	15	4.2	0.00012	3.4
Cellular macromolecular complex subunit organization	19	5.4	0.00031	2.7
Regulation of cell proliferation	31	8.8	0.00051	2
Cellular macromolecular complex assembly	17	4.8	0.00068	2.7
Chromatin assembly or disassembly	10	2.8	0.001	3.9
Nucleobase, nucleoside, nucleotide and nucleic acid metabolic process	92	26.1	0.0011	1.3
Nitrogen compound metabolic process	99	28	0.0017	1.3
Cellular nitrogen compound metabolic process	96	27.2	0.0023	1.3
Negative regulation of biological process	54	15.3	0.0026	1.5
Cellular developmental process	51	14.4	0.0033	1.5
Regulation of cellular component organization	19	5.4	0.005	2.1
Negative regulation of cellular metabolic process	26	7.4	0.0052	1.8
Negative regulation of cellular process	49	13.9	0.0052	1.5
Negative regulation of macromolecule metabolic process	26	7.4	0.0065	1.8
Cell differentiation	48	13.6	0.0065	1.5
Response to radiation	11	3.1	0.007	2.7
Response to abiotic stimulus	16	4.5	0.0072	2.2
Negative regulation of metabolic process	27	7.6	0.0073	1.7
Second-messenger-mediated signaling	12	3.4	0.0077	2.5
Regulation of cell development	11	3.1	0.0083	2.7
Protein oligomerization	10	2.8	0.0083	2.9
Cellular macromolecule metabolic process	125	35.4	0.0084	1.2
Regulation of developmental process	24	6.8	0.0087	1.8
Positive regulation of protein metabolic process	12	3.4	0.0098	2.5
Anatomical structure development	67	19	0.011	1.3
Heart development	11	3.1	0.011	2.6
Positive regulation of protein modification process	10	2.8	0.013	2.7
Negative regulation of cell proliferation	15	4.2	0.014	2.1
Negative regulation of macromolecule biosynthetic process	20	5.7	0.014	1.8
Negative regulation of nucleobase, nucleoside, nucleotide and nucleic acid metabolic process	19	5.4	0.015	1.9
Negative regulation of nitrogen compound metabolic process	19	5.4	0.016	1.8
Negative regulation of cellular biosynthetic process	20	5.7	0.018	1.8
Positive regulation of cellular protein metabolic process	11	3.1	0.019	2.4
Regulation of cell differentiation	18	5.1	0.02	1.8
Negative regulation of biosynthetic process	20	5.7	0.021	1.7
Positive regulation of cellular process	50	14.2	0.022	1.4
Developmental process	78	22.1	0.027	1.2
Response to stimulus	85	24.1	0.031	1.2
Positive regulation of biological process	53	15	0.034	1.3
Regulation of protein modification process	12	3.4	0.035	2
Macromolecule metabolic process	130	36.8	0.039	1.1
Monocarboxylic acid metabolic process	12	3.4	0.039	2
Organ development	46	13	0.04	1.3
System development	59	16.7	0.041	1.3
Intracellular signaling cascade	35	9.9	0.042	1.4
Hemopoiesis	10	2.8	0.048	2.1
B)
Term	Count	%	P-Value	Fold Enrichment
Organ development	14	21.5	0.0012	2.6
Extracellular structure organization	5	7.7	0.0014	10.1
System development	16	24.6	0.002	2.3
Collagen fibril organization	3	4.6	0.0033	34
Extracellular matrix organization	4	6.2	0.0036	12.6
Cell adhesion	8	12.3	0.0042	3.8
Biological adhesion	8	12.3	0.0043	3.7
Anatomical structure development	16	24.6	0.0045	2.1
Multicellular organismal process	21	32.3	0.014	1.6
Multicellular organismal development	16	24.6	0.015	1.8
Developmental process	17	26.2	0.015	1.8
Blood vessel development	4	6.2	0.036	5.4
Vasculature development	4	6.2	0.038	5.2
Response to stimulus	17	26.2	0.039	1.6
C)
Term	Count	%	P-Value	Fold Enrichment
Amine transport	7	5.8	3.2e-05	11.3
Carboxylic acid transport	7	5.8	0.00011	9.1
Organic acid transport	7	5.8	0.00011	9
Cellular amino acid biosynthetic process	5	4.2	0.00014	18.7
Amine biosynthetic process	5	4.2	0.00081	11.8
Amino acid transport	5	4.2	0.0012	10.6
Transport	24	20	0.0056	1.7
Response to extracellular stimulus	6	5	0.0056	5.2
Cellular amino acid metabolic process	6	5	0.0063	5.1
Establishment of localization	24	20	0.0063	1.7
Oxoacid metabolic process	9	7.5	0.0078	3.1
Carboxylic acid metabolic process	9	7.5	0.0078	3.1
Organic acid metabolic process	9	7.5	0.0081	3.1
Organic acid biosynthetic process	5	4.2	0.0085	6.2
Carboxylic acid biosynthetic process	5	4.2	0.0085	6.2
Cellular ketone metabolic process	9	7.5	0.0087	3
Potassium ion transport	5	4.2	0.0094	6
Regulation of protein amino acid phosphorylation	5	4.2	0.012	5.5
Protein oligomerization	5	4.2	0.013	5.5
Localization	25	20.8	0.014	1.6
Oxidation reduction	9	7.5	0.017	2.7
Amine metabolic process	7	5.8	0.017	3.3
Response to endogenous stimulus	7	5.8	0.018	3.3
Response to nutrient levels	5	4.2	0.019	4.8
Cellular amine metabolic process	6	5	0.021	3.8
Response to inorganic substance	5	4.2	0.022	4.7
Nitrogen compound biosynthetic process	6	5	0.026	3.5
Inflammatory response	6	5	0.026	3.5
Organ development	16	13.3	0.031	1.8
Response to organic substance	9	7.5	0.032	2.4
Metal ion transport	7	5.8	0.033	2.9
Cellular amino acid and derivative metabolic process	6	5	0.035	3.3
Regulation of cellular protein metabolic process	7	5.8	0.036	2.8
Defense response	8	6.7	0.039	2.5
Homeostatic process	9	7.5	0.04	2.3
Response to hormone stimulus	6	5	0.041	3.1
Cellular ion homeostasis	6	5	0.044	3.1
Response to external stimulus	10	8.3	0.045	2.1
Protein complex assembly	7	5.8	0.046	2.6
Protein complex biogenesis	7	5.8	0.046	2.6
Cellular chemical homeostasis	6	5	0.047	3
Chemical homeostasis	7	5.8	0.049	2.6
Regulation of cell proliferation	9	7.5	0.05	2.2
D)
Term	Count	%	P-Value	Fold Enrichment
ncRNA metabolic process	36	6	1.9e-15	5.2
Cellular metabolic process	266	44	5.6e-11	1.3
ncRNA processing	27	4.5	6.7e-11	4.8
Ribosome biogenesis	22	3.6	8.2e-11	6
Ribonucleoprotein complex biogenesis	26	4.3	1.6e-10	4.8
Sterol biosynthetic process	13	2.1	2.1e-10	12.3
tRNA metabolic process	21	3.5	3.1e-10	5.9
RNA processing	44	7.3	7.6e-09	2.7
RNA metabolic process	62	10.2	7.6e-09	2.2
Metabolic process	286	47.3	2e-08	1.2
Cholesterol biosynthetic process	10	1.7	3.6e-08	12.8
Cellular nitrogen compound metabolic process	160	26.4	8.3e-08	1.4
Cellular amino acid and derivative metabolic process	31	5.1	2.8e-07	2.9
Sterol metabolic process	16	2.6	3.2e-07	5.3
Nitrogen compound metabolic process	161	26.6	3.5e-07	1.4
Primary metabolic process	259	42.8	4.7e-07	1.2
Cholesterol metabolic process	14	2.3	3.5e-06	5.1
rRNA processing	14	2.3	3.5e-06	5.1
Cellular amino acid metabolic process	22	3.6	4.6e-06	3.2
Cellular amine metabolic process	26	4.3	5.6e-06	2.8
rRNA metabolic process	14	2.3	5.7e-06	4.8
Nucleobase, nucleoside, nucleotide and nucleic acid metabolic process	143	23.6	6.6e-06	1.4
Translation	27	4.5	7.9e-06	2.7
Steroid biosynthetic process	13	2.1	8.4e-06	5.1
tRNA processing	12	2	1.6e-05	5.2
Cellular macromolecule metabolic process	199	32.9	1.9e-05	1.3
Gene expression	127	21	2e-05	1.4
Biosynthetic process	145	24	2.1e-05	1.4
Cellular process	352	58.2	3.3e-05	1.1
Alcohol metabolic process	30	5	4.1e-05	2.3
Nitrogen compound biosynthetic process	25	4.1	4.8e-05	2.6
tRNA aminoacylation	9	1.5	5.9e-05	6.5
tRNA aminoacylation for protein translation	9	1.5	5.9e-05	6.5
Amino acid activation	9	1.5	5.9e-05	6.5
Amine metabolic process	28	4.6	7.7e-05	2.3
RNA modification	9	1.5	8.2e-05	6.2
Cellular biosynthetic process	138	22.8	0.00011	1.3
Amine biosynthetic process	11	1.8	0.00015	4.5
Cellular component biogenesis	50	8.3	0.00048	1.7
Macromolecule metabolic process	206	34	0.0005	1.2
Pseudouridine synthesis	5	0.8	0.00063	11.9
Organic acid metabolic process	32	5.3	0.00079	1.9
Aspartate family amino acid biosynthetic process	5	0.8	0.00084	11.1
Protein tetramerization	7	1.2	0.001	6
Steroid metabolic process	16	2.6	0.0012	2.6
rRNA modification	4	0.7	0.0013	16.6
Polyamine biosynthetic process	4	0.7	0.0013	16.6
Oxoacid metabolic process	31	5.1	0.0014	1.9
Carboxylic acid metabolic process	31	5.1	0.0014	1.9
Cellular protein metabolic process	95	15.7	0.0018	1.3
Cellular ketone metabolic process	31	5.1	0.0019	1.8
Isoprenoid biosynthetic process	5	0.8	0.0027	8.3
Negative regulation of protein modification process	11	1.8	0.0031	3.1
Oxidation reduction	33	5.5	0.0033	1.7
Polyamine metabolic process	4	0.7	0.0037	12.1
Cellular macromolecule catabolic process	36	6	0.0037	1.6
Cellular catabolic process	47	7.8	0.0039	1.5
Macromolecule catabolic process	38	6.3	0.0041	1.6
Cellular amino acid biosynthetic process	7	1.2	0.0041	4.6
Catabolic process	55	9.1	0.0043	1.5
Aspartate family amino acid metabolic process	5	0.8	0.0053	6.9
Protein homotetramerization	5	0.8	0.0071	6.4
Response to antibiotic	5	0.8	0.0071	6.4
Protein catabolic process	31	5.1	0.0073	1.7
Modification-dependent macromolecule catabolic process	29	4.8	0.0081	1.7
Modification-dependent protein catabolic process	29	4.8	0.0081	1.7
Proteolysis involved in cellular protein catabolic process	29	4.8	0.014	1.6
Nucleobase, nucleoside and nucleotide metabolic process	18	3	0.015	1.9
Cellular protein catabolic process	29	4.8	0.015	1.6
Purine ribonucleoside monophosphate biosynthetic process	4	0.7	0.016	7.4
Purine nucleoside monophosphate biosynthetic process	4	0.7	0.016	7.4
Transmembrane receptor protein tyrosine phosphatase signaling pathway	3	0.5	0.017	14.2
DNA fragmentation involved in apoptosis	4	0.7	0.018	7
Negative regulation of cellular protein metabolic process	12	2	0.02	2.2
Purine nucleoside monophosphate metabolic process	4	0.7	0.021	6.6
Purine ribonucleoside monophosphate metabolic process	4	0.7	0.021	6.6
Protein transport	34	5.6	0.022	1.5
Sulfur metabolic process	9	1.5	0.023	2.6
Negative regulation of protein ubiquitination	7	1.2	0.024	3.1
Protein homooligomerization	8	1.3	0.024	2.8
Establishment of protein localization	34	5.6	0.025	1.5
Negative regulation of protein metabolic process	12	2	0.026	2.1
Generation of precursor metabolites and energy	17	2.8	0.027	1.8
Response to drug	13	2.1	0.03	2
Ribonucleoside monophosphate biosynthetic process	4	0.7	0.031	5.8
Cell structure disassembly during apoptosis	4	0.7	0.031	5.8
Positive regulation of translation	4	0.7	0.031	5.8
Ubiquitin-dependent protein catabolic process	14	2.3	0.031	1.9
Nucleobase, nucleoside, nucleotide and nucleic acid biosynthetic process	12	2	0.032	2.1
Nucleobase, nucleoside and nucleotide biosynthetic process	12	2	0.032	2.1
Nucleotide metabolic process	16	2.6	0.032	1.8
Nucleoside phosphate metabolic process	16	2.6	0.032	1.8
Protein metabolic process	101	16.7	0.034	1.2
2-oxoglutarate metabolic process	3	0.5	0.035	10
Lipid biosynthetic process	17	2.8	0.035	1.7
Monosaccharide metabolic process	13	2.1	0.036	1.9
Protein oligomerization	11	1.8	0.037	2.1
Protein localization	37	6.1	0.038	1.4
Ribonucleoside monophosphate metabolic process	4	0.7	0.038	5.3
Blastocyst development	5	0.8	0.039	3.9
Cell redox homeostasis	6	1	0.041	3.2
Protein folding	11	1.8	0.041	2.1
Coenzyme metabolic process	10	1.7	0.041	2.2
Apoptotic nuclear changes	4	0.7	0.042	5.1
DNA catabolic process, endonucleolytic	4	0.7	0.042	5.1
Isoprenoid metabolic process	5	0.8	0.042	3.8
Dephosphorylation	10	1.7	0.043	2.2
Organic acid biosynthetic process	10	1.7	0.044	2.1
Carboxylic acid biosynthetic process	10	1.7	0.044	2.1
Cellular carbohydrate metabolic process	19	3.1	0.044	1.6
Macromolecular complex assembly	29	4.8	0.045	1.4
Anaphase-promoting complex-dependent proteasomal ubiquitin-dependent protein catabolic process	6	1	0.045	3.1
Negative regulation of ubiquitin-protein ligase activity during mitotic cell cycle	6	1	0.045	3.1
Protein amino acid dephosphorylation	9	1.5	0.047	2.2
Aging	8	1.3	0.048	2.4
Nucleoside monophosphate metabolic process	6	1	0.048	3
